# Supplementary material for: Cyclization vs. Cyclization/Dimerization in o-Amidostilbene Radical Cation Cascade Reactions: The Amide Question
Source: MDPI journal article supplement (doi:10.3390/molecules16097267), 2011-08-25
Supplement: s1 [file s1]

**X-ray Crystal Data for Compound 4b.** X-ray diffraction analysis was carried out on a Bruker SMART APEX II CCD area detector system equipped with a graphite monochromator and a Mo K $\alpha$  fine-focus sealed tube ( $\lambda=0.71073$  Å), at 100K. The structure was solved by direct methods (SHELXS-97) and refined with full-matrix least-squares on  $F^2$  (SHELXL-97). All non-hydrogen atoms were refined anisotropically, and all hydrogen atoms were placed in idealized positions and refined as riding atoms with the relative isotropic parameters.

Crystallographic data of **Compound 4b**: Colorless block crystals from EtOH, C<sub>36</sub>H<sub>36</sub>N<sub>2</sub>O<sub>6</sub>.H<sub>2</sub>O,  $M_r = 610.68$ , monoclinic, space group  $P2_1/c$ ,  $a = 16.4733(3)$  Å,  $b = 18.0651(3)$  Å,  $c = 31.8360(6)$  Å,  $\alpha = \gamma = 90^\circ$ ,  $\beta = 91.2600(10)^\circ$ ,  $V = 9471.8(3)$  Å<sup>3</sup>,  $T = 100$  K,  $Z = 12$ ,  $D_{\text{calcd}} = 1.285$  gcm<sup>-3</sup>, crystal size 0.20 x 0.35 x 0.49 mm<sup>3</sup>,  $F(000) = 3888$ . The final  $R_1$  value is 0.0534 ( $wR_2 = 0.1141$ ) for 21783 reflections [ $I > 2\sigma(I)$ ].

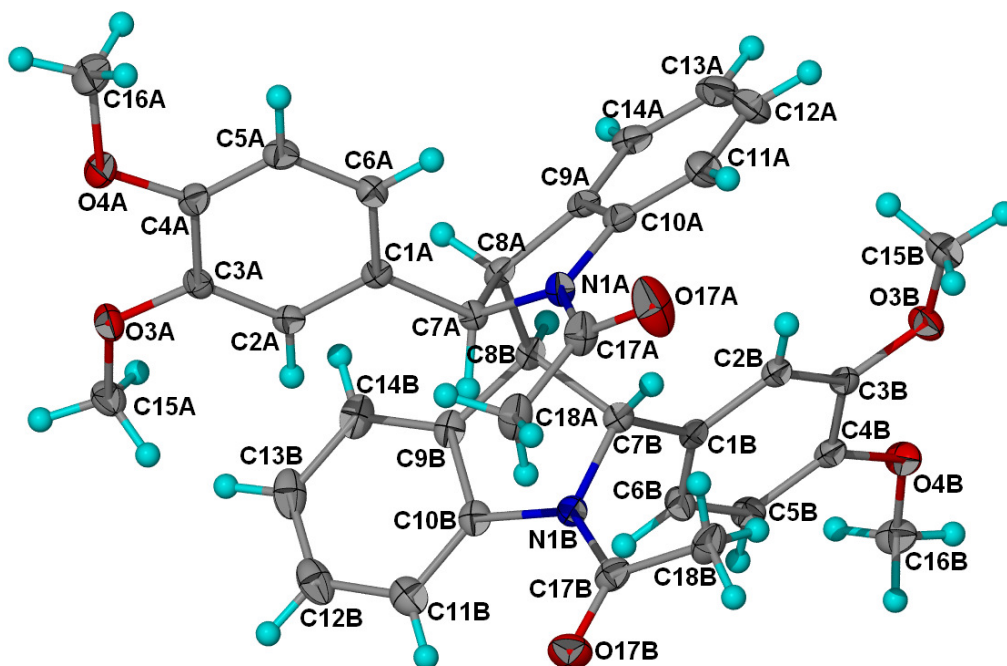

Figure 1. X-ray crystal structure of **Compound 4b**. Thermal ellipsoids are shown at the 50% probability level.

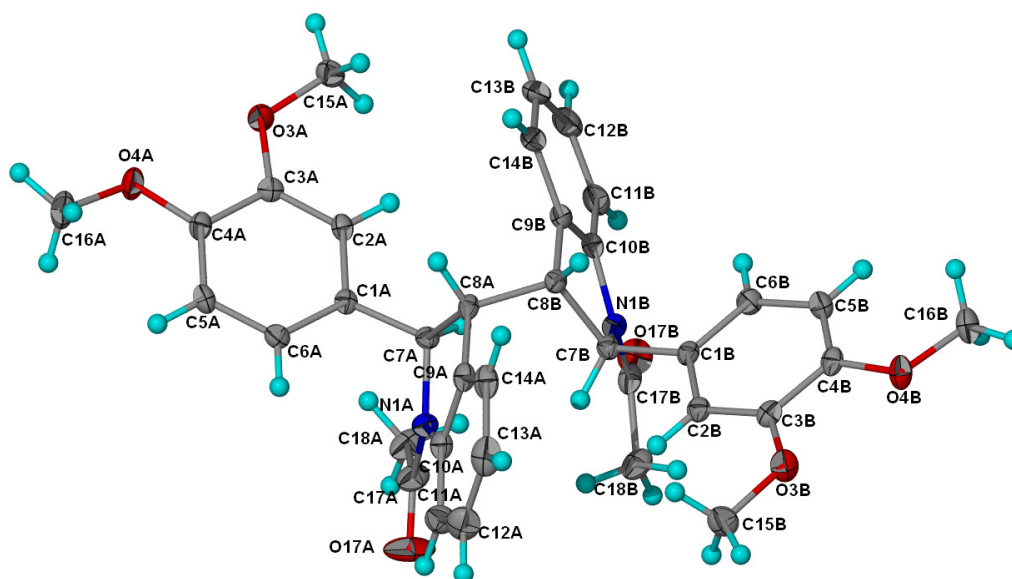

Figure 2. X-ray crystal structure of **Compound 4b**. Thermal ellipsoids are shown at the 50% probability level.
