# Supplementary material for: Cyclization vs. Cyclization/Dimerization in o-Amidostilbene Radical Cation Cascade Reactions: The Amide Question
Source: MDPI journal article supplement (doi:10.3390/molecules16097267), 2011-08-25
Supplement: s1 [file s1]

# Electronic Supplementary Information

## Cyclization vs. Cyclization / Dimerization in *o*-amidostilbene Radical Cation Cascade Reactions : The Amide Question (Spectral Data)

Chin Hui Kee, Azhar Ariffin, Khalijah Awang, Ibrahim Noorbatchesa,  
Koichi Takeya, Hiroshi Morita, Chuan Gee Lim and Noel Francis Thomas\*  
noelfthomas@um.edu.my

### Contents

### List of Figures

|     |                                                                                   |    |
|-----|-----------------------------------------------------------------------------------|----|
| S1  | <sup>1</sup> H spectrum (CDCl <sub>3</sub> , 400MHz) of <b>14a</b> . . . . .      | 3  |
| S2  | <sup>13</sup> C spectrum (CDCl <sub>3</sub> , 100MHz) of <b>14a</b> . . . . .     | 4  |
| S3  | HSQC spectrum (CDCl <sub>3</sub> , 400MHz) of <b>14a</b> . . . . .                | 5  |
| S4  | HMBC spectrum (CDCl <sub>3</sub> , 400MHz) of <b>14a</b> . . . . .                | 6  |
| S5  | <sup>1</sup> H spectrum (CDCl <sub>3</sub> , 400MHz) of (±) <b>14b</b> . . . . .  | 7  |
| S6  | <sup>13</sup> C spectrum (CDCl <sub>3</sub> , 100MHz) of (±) <b>14b</b> . . . . . | 8  |
| S7  | HSQC spectrum (CDCl <sub>3</sub> , 400MHz) of (±) <b>14b</b> . . . . .            | 9  |
| S8  | HMBC spectrum (CDCl <sub>3</sub> , 400MHz) of (±) <b>14b</b> . . . . .            | 10 |
| S9  | H2BC spectrum (CDCl <sub>3</sub> , 400MHz) of (±) <b>14b</b> . . . . .            | 11 |
| S10 | <sup>1</sup> H spectrum (CDCl <sub>3</sub> , 400MHz) of <b>15</b> . . . . .       | 12 |
| S11 | <sup>13</sup> C spectrum (CDCl <sub>3</sub> , 100MHz) of <b>15</b> . . . . .      | 13 |
| S12 | HSQC spectrum (CDCl <sub>3</sub> , 400MHz) of <b>15</b> . . . . .                 | 14 |
| S13 | HMBC spectrum (CDCl <sub>3</sub> , 400MHz) of <b>15</b> . . . . .                 | 15 |
| S14 | <sup>1</sup> H spectrum (CDCl <sub>3</sub> , 400MHz) of <b>16</b> . . . . .       | 16 |
| S15 | <sup>13</sup> C spectrum (CDCl <sub>3</sub> , 100MHz) of <b>16</b> . . . . .      | 17 |
| S16 | HSQC spectrum (CDCl <sub>3</sub> , 400MHz) of <b>16</b> . . . . .                 | 18 |
| S17 | HMBC spectrum (CDCl <sub>3</sub> , 400MHz) of <b>16</b> . . . . .                 | 19 |
| S18 | H2BC spectrum (CDCl <sub>3</sub> , 400MHz) of <b>16</b> . . . . .                 | 20 |
| S19 | <sup>1</sup> H spectrum (CDCl <sub>3</sub> , 400MHz) of <b>17</b> . . . . .       | 21 |
| S20 | <sup>13</sup> C spectrum (CDCl <sub>3</sub> , 100MHz) of <b>17</b> . . . . .      | 22 |

|     |                                                                           |    |
|-----|---------------------------------------------------------------------------|----|
| S21 | HMQC spectrum (CDCl <sub>3</sub> , 400MHz) of <b>17</b> .                 | 23 |
| S22 | HMBC spectrum (CDCl <sub>3</sub> , 400MHz) of <b>17</b> .                 | 24 |
| S23 | <sup>1</sup> H spectrum (CDCl <sub>3</sub> , 400MHz) of <b>18</b> .       | 25 |
| S24 | <sup>13</sup> C spectrum (CDCl <sub>3</sub> , 100MHz) of <b>18</b> .      | 26 |
| S25 | HSQC spectrum (CDCl <sub>3</sub> , 400MHz) of <b>18</b> .                 | 27 |
| S26 | HMBC spectrum (CDCl <sub>3</sub> , 400MHz) of <b>18</b> .                 | 28 |
| S27 | HMBC spectrum (CDCl <sub>3</sub> , 400MHz) of <b>18</b> (expanded).       | 29 |
| S28 | <sup>1</sup> H spectrum (CDCl <sub>3</sub> , 400MHz) of <b>19</b> .       | 30 |
| S29 | <sup>13</sup> C spectrum (CDCl <sub>3</sub> , 100MHz) of <b>19</b> .      | 31 |
| S30 | HSQC spectrum (CDCl <sub>3</sub> , 400MHz) of <b>19</b> .                 | 32 |
| S31 | HMBC spectrum (CDCl <sub>3</sub> , 400MHz) of <b>19</b> .                 | 33 |
| S32 | <sup>1</sup> H spectrum (CDCl <sub>3</sub> , 400MHz) of <b>20a</b> .      | 34 |
| S33 | <sup>13</sup> C spectrum (CDCl <sub>3</sub> , 100MHz) of <b>20a</b> .     | 35 |
| S34 | HSQC spectrum (CDCl <sub>3</sub> , 400MHz) of <b>20a</b> .                | 36 |
| S35 | HMBC spectrum (CDCl <sub>3</sub> , 400MHz) of <b>20a</b> .                | 37 |
| S36 | H2BC spectrum (CDCl <sub>3</sub> , 400MHz) of <b>20a</b> .                | 38 |
| S37 | <sup>1</sup> H spectrum (CDCl <sub>3</sub> , 400MHz) of (±) <b>20b</b> .  | 39 |
| S38 | <sup>13</sup> C spectrum (CDCl <sub>3</sub> , 100MHz) of (±) <b>20b</b> . | 40 |
| S39 | HSQC spectrum (CDCl <sub>3</sub> , 400MHz) of (±) <b>20b</b> .            | 41 |
| S40 | HMBC spectrum (CDCl <sub>3</sub> , 400MHz) of (±) <b>20b</b> .            | 42 |
| S41 | H2BC spectrum (CDCl <sub>3</sub> , 400MHz) of (±) <b>20b</b> .            | 43 |
| S42 | <sup>1</sup> H spectrum (CDCl <sub>3</sub> , 400MHz) of <b>21a</b> .      | 44 |
| S43 | <sup>13</sup> C spectrum (CDCl <sub>3</sub> , 100MHz) of <b>21a</b> .     | 45 |
| S44 | HSQC spectrum (CDCl <sub>3</sub> , 400MHz) of <b>21a</b> .                | 46 |
| S45 | HMBC spectrum (CDCl <sub>3</sub> , 400MHz) of <b>21a</b> .                | 47 |
| S46 | <sup>1</sup> H spectrum (CDCl <sub>3</sub> , 400MHz) of (±) <b>21b</b> .  | 48 |
| S47 | <sup>13</sup> C spectrum (CDCl <sub>3</sub> , 100MHz) of (±) <b>21b</b> . | 49 |
| S48 | HSQC spectrum (CDCl <sub>3</sub> , 400MHz) of (±) <b>21b</b> .            | 50 |
| S49 | HMBC spectrum (CDCl <sub>3</sub> , 400MHz) of (±) <b>21b</b> .            | 51 |
| S50 | H2BC spectrum (CDCl <sub>3</sub> , 400MHz) of (±) <b>21b</b> .            | 52 |

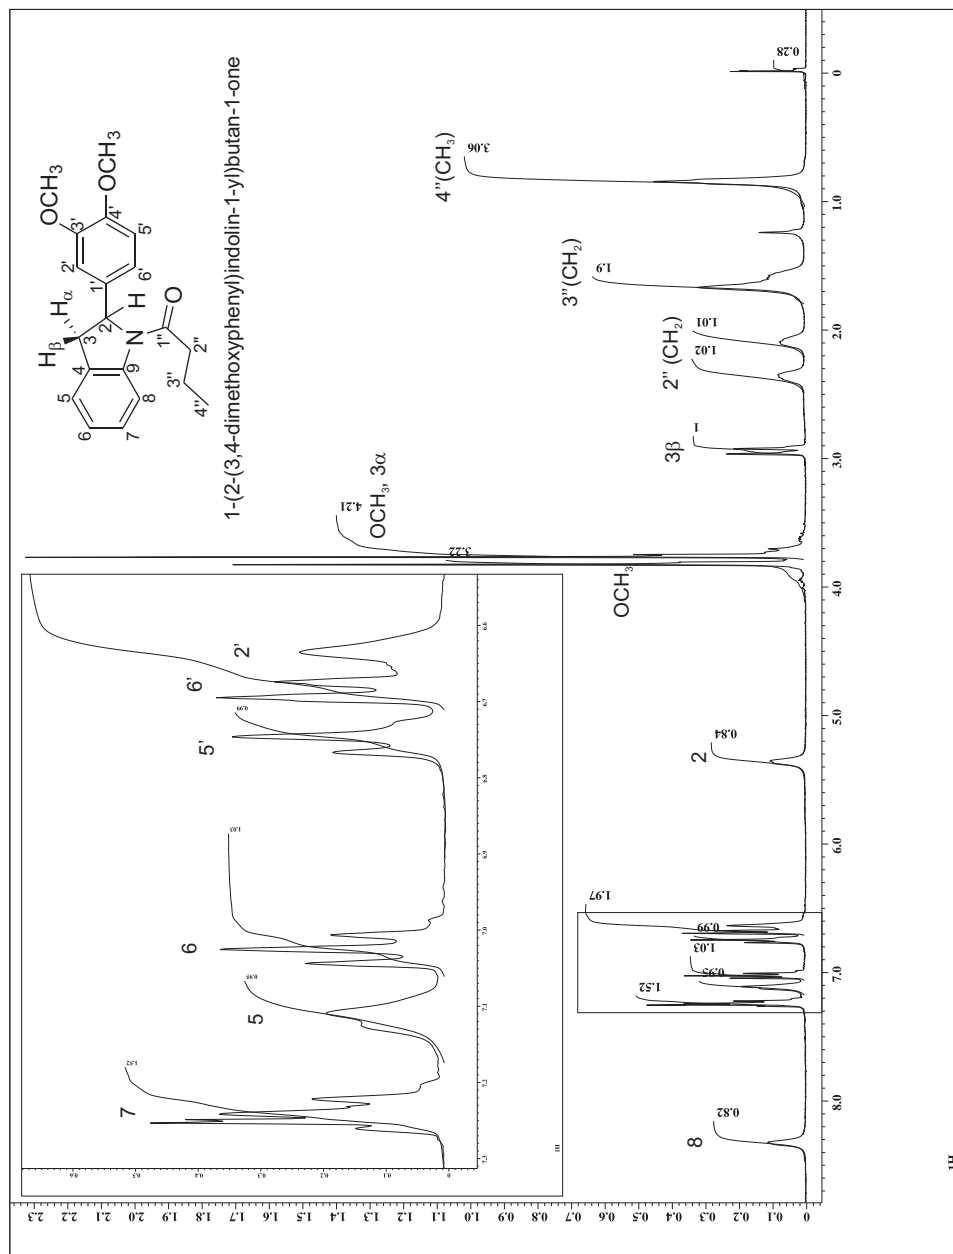

Figure S1:  $^1H$  spectrum (CDCl<sub>3</sub>, 400MHz) of **14a**.

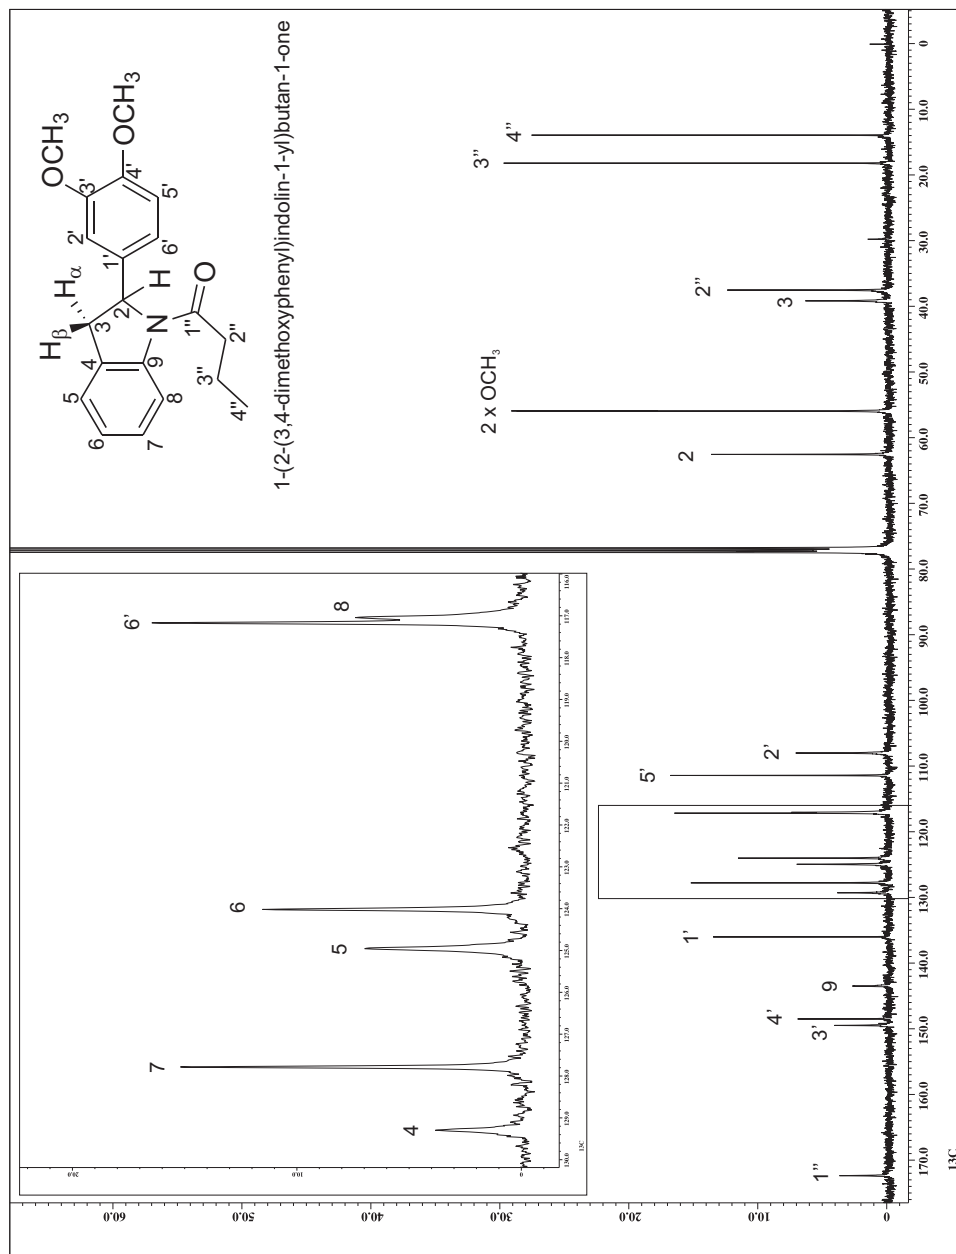

Figure S2: <sup>13</sup>C spectrum (CDCl<sub>3</sub>, 100MHz) of **14a**.



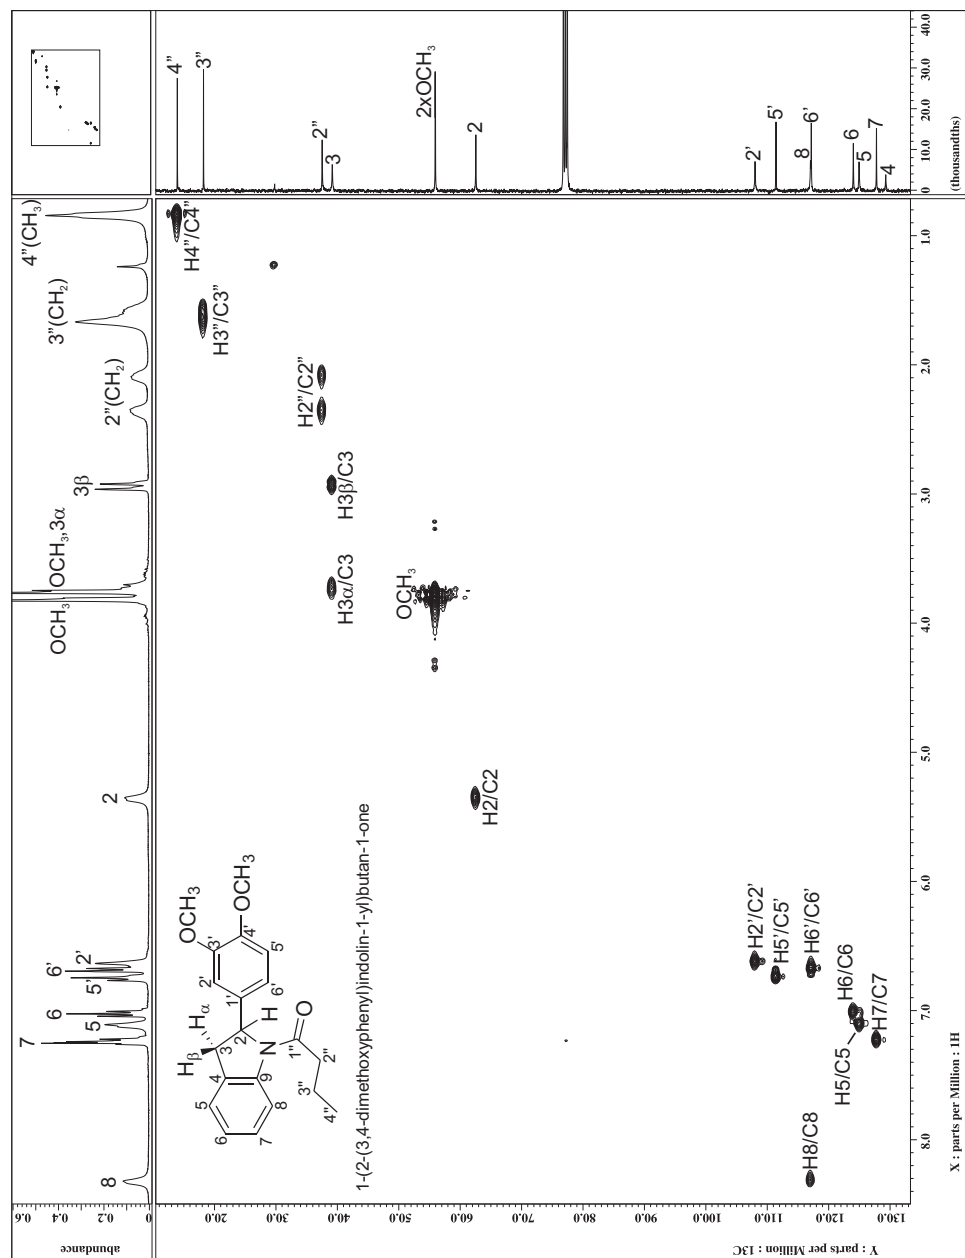

Figure S3: HSQC spectrum (CDCl<sub>3</sub>, 400MHz) of **14a**.

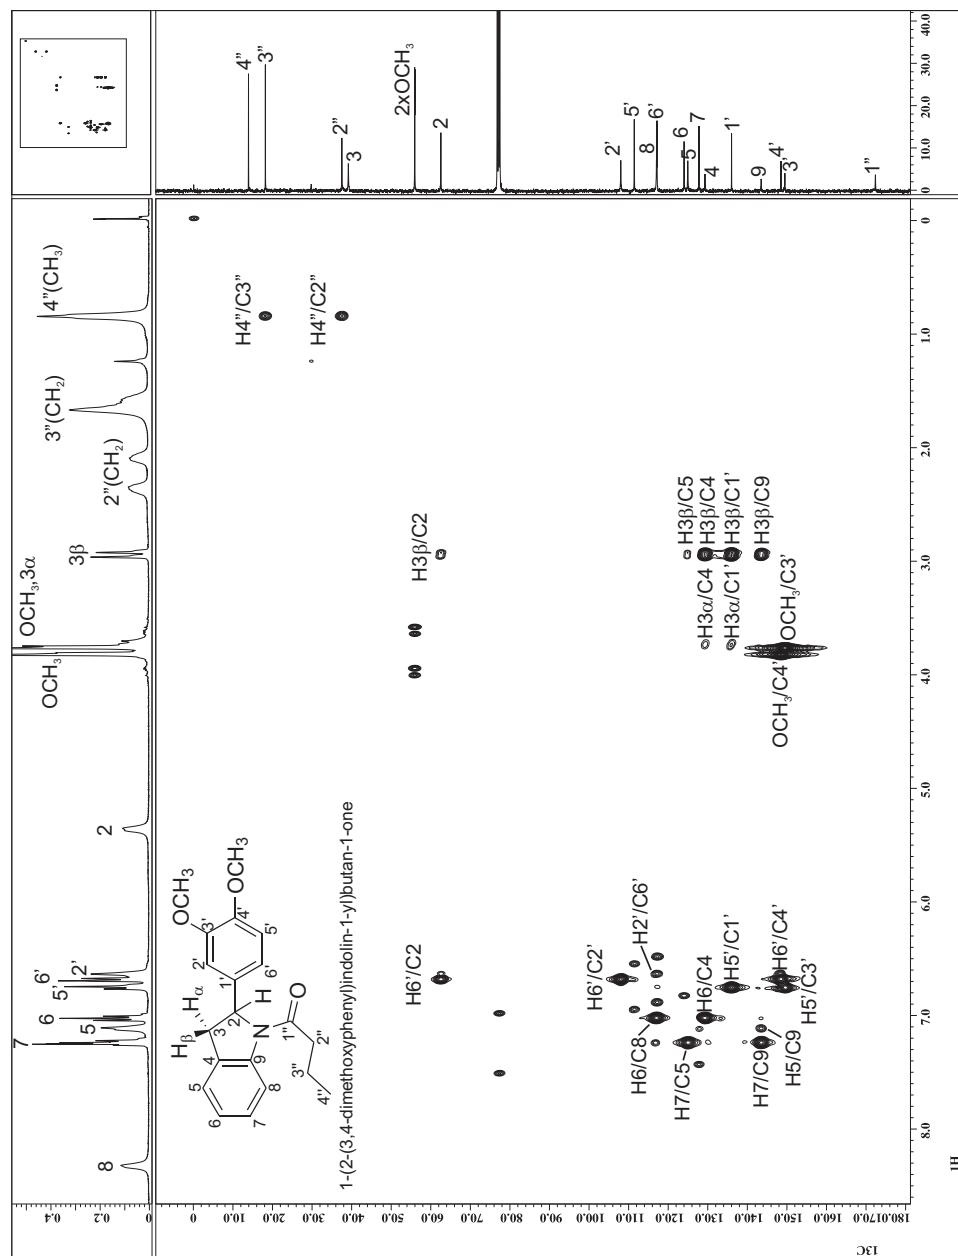

Figure S4: HMBC spectrum ( $\text{CDCl}_3$ , 400MHz) of **14a**.

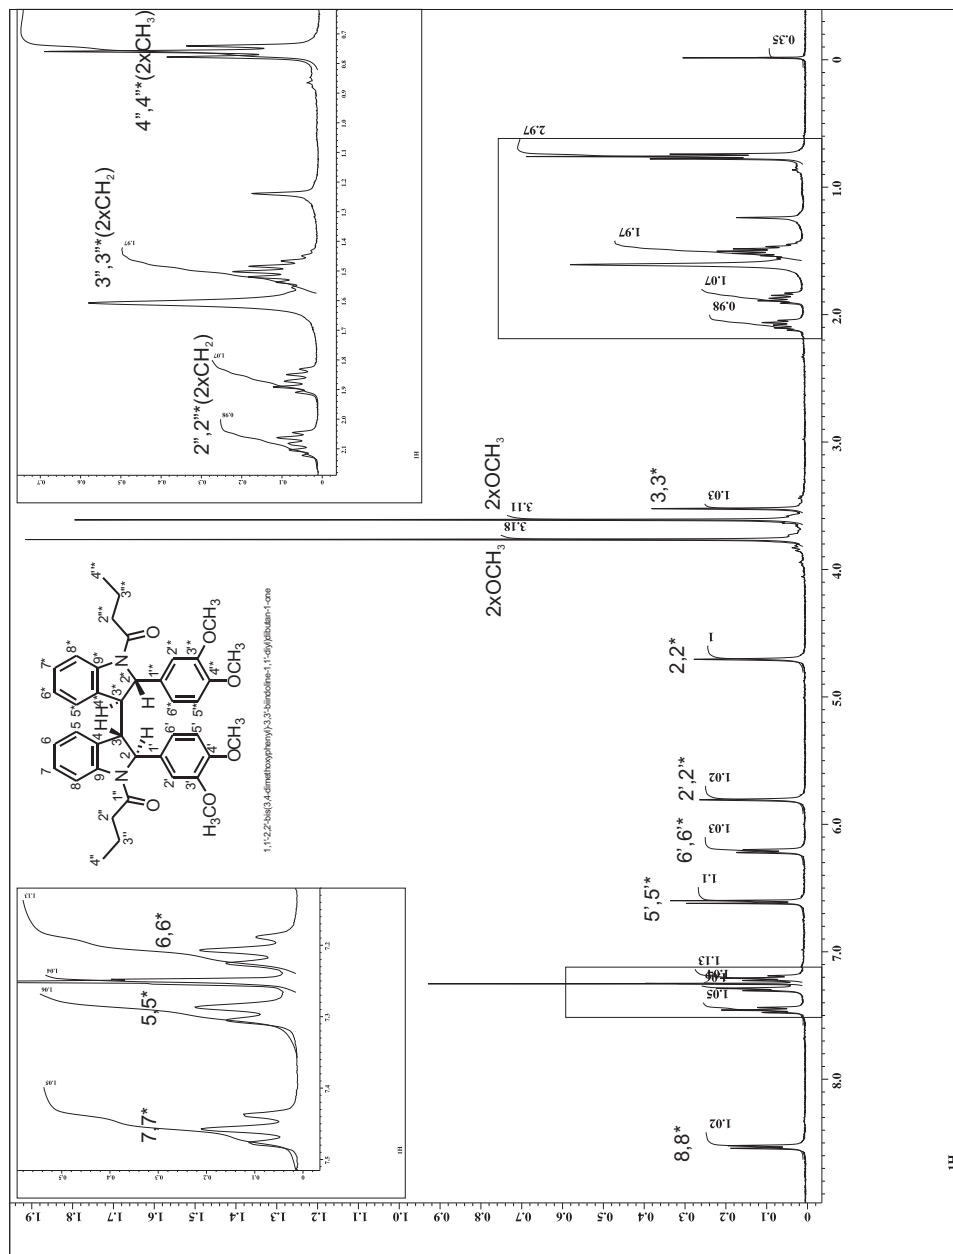

Figure S5: <sup>1</sup>H spectrum (CDCl<sub>3</sub>, 400MHz) of (±)**14b**.

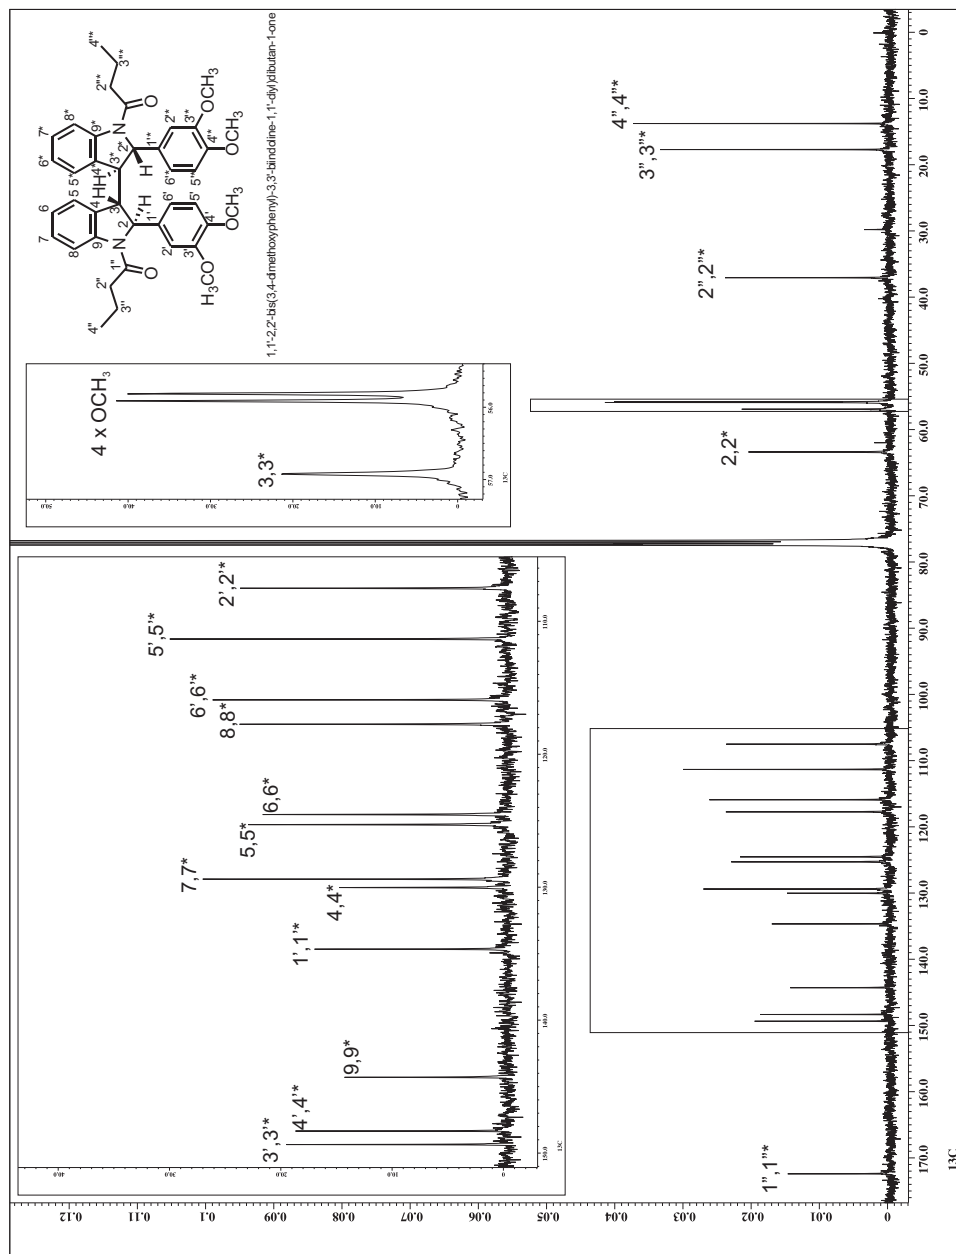

Figure S6: <sup>13</sup>C spectrum (CDCl<sub>3</sub>, 100MHz) of (±)14b.

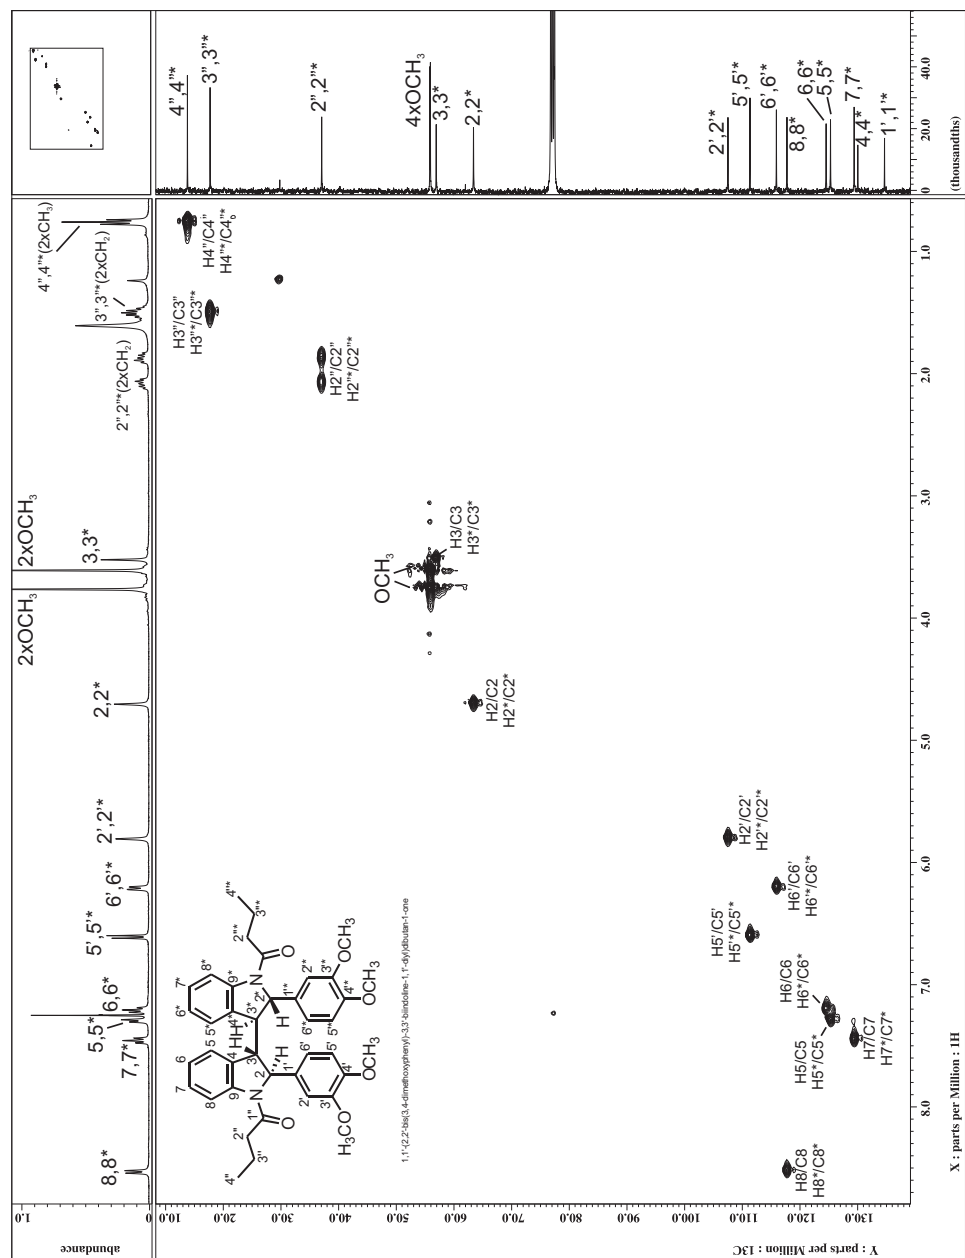

Figure S7: HSQC spectrum (CDCl<sub>3</sub>, 400MHz) of (±)14b.

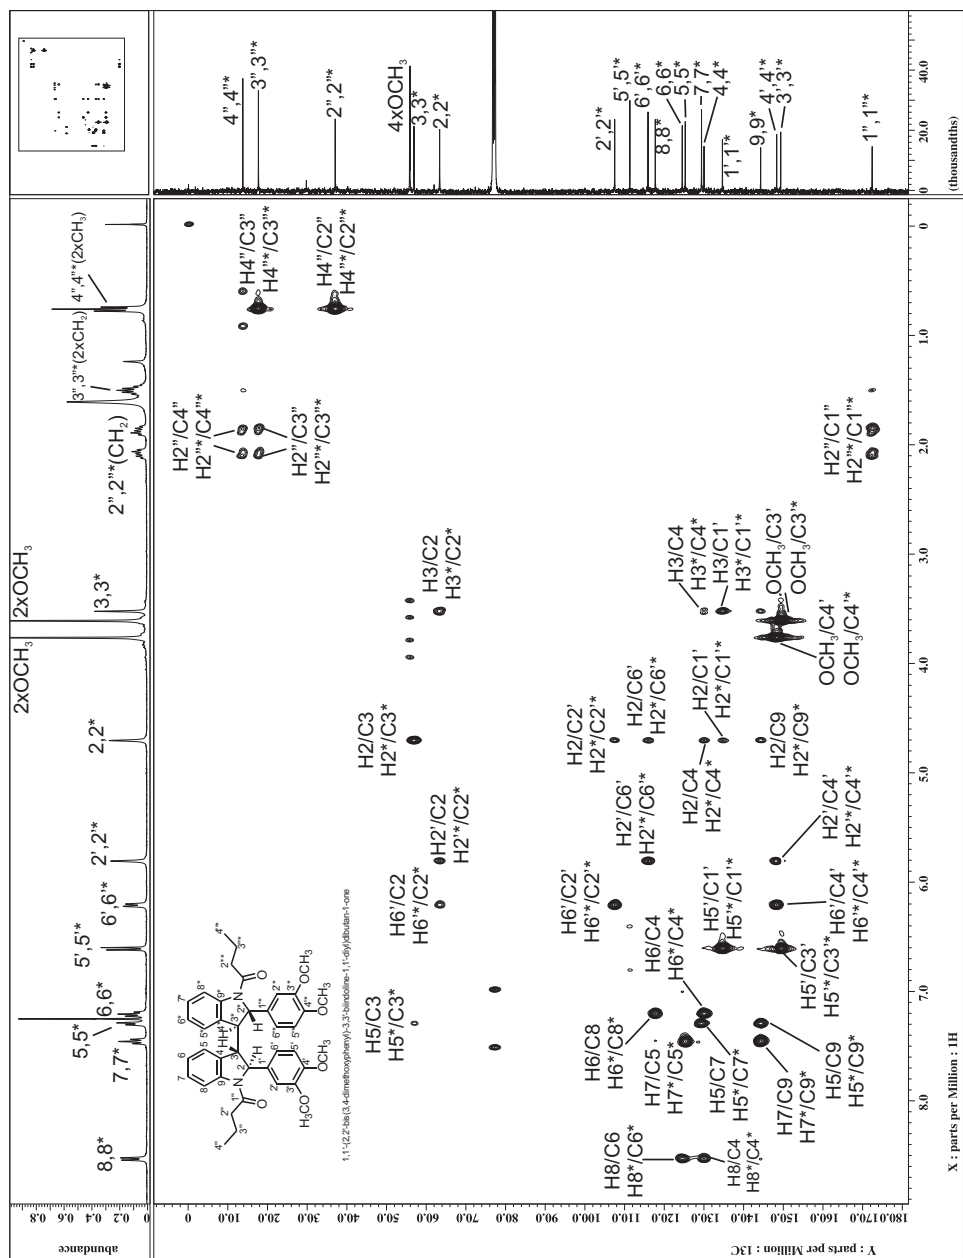

Figure S8: HMBC spectrum ( $\text{CDCl}_3$ , 400MHz) of ( $\pm$ )**14b**.

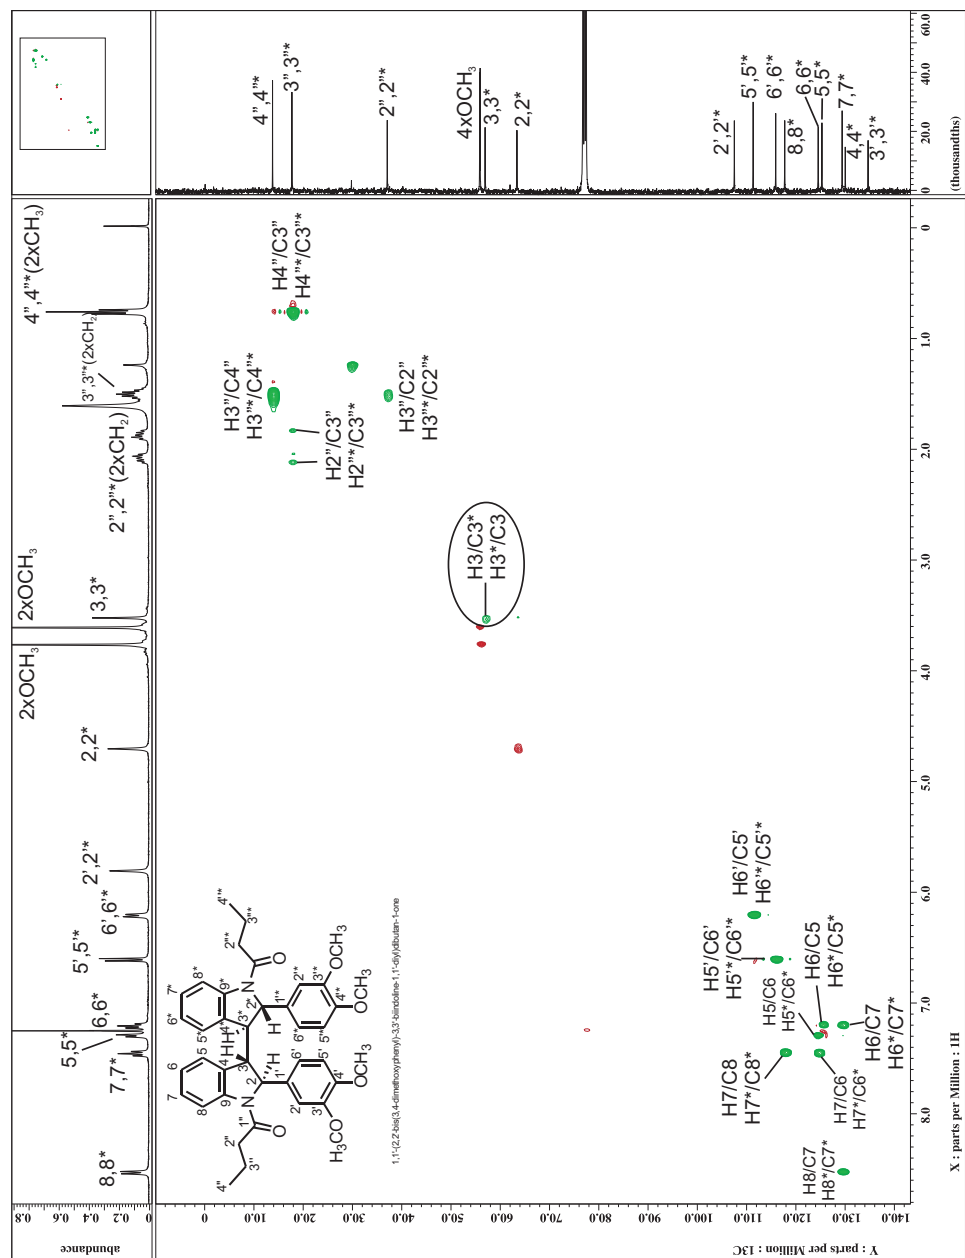

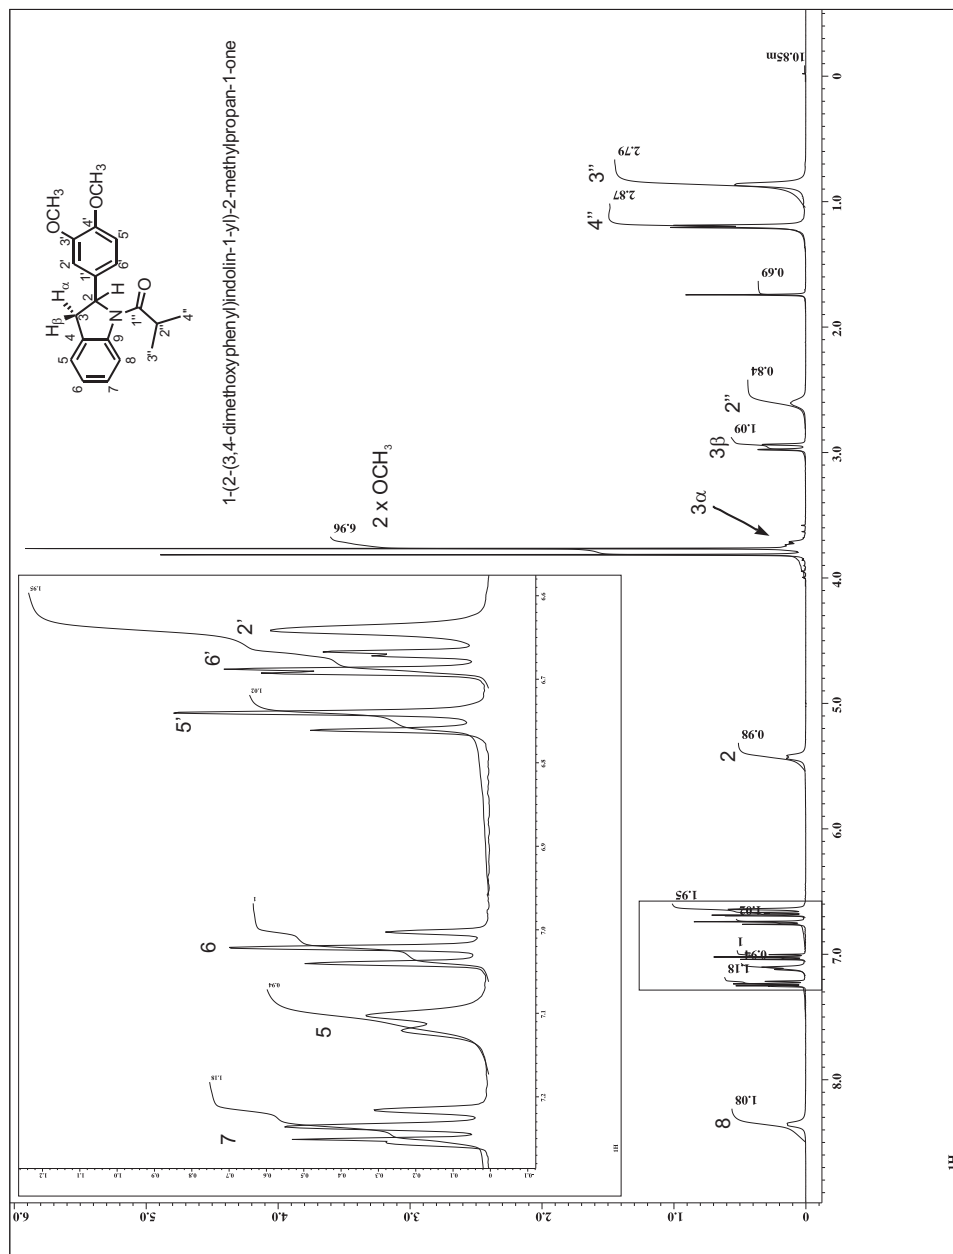

Figure S10: <sup>1</sup>H spectrum (CDCl<sub>3</sub>, 400MHz) of **15**.



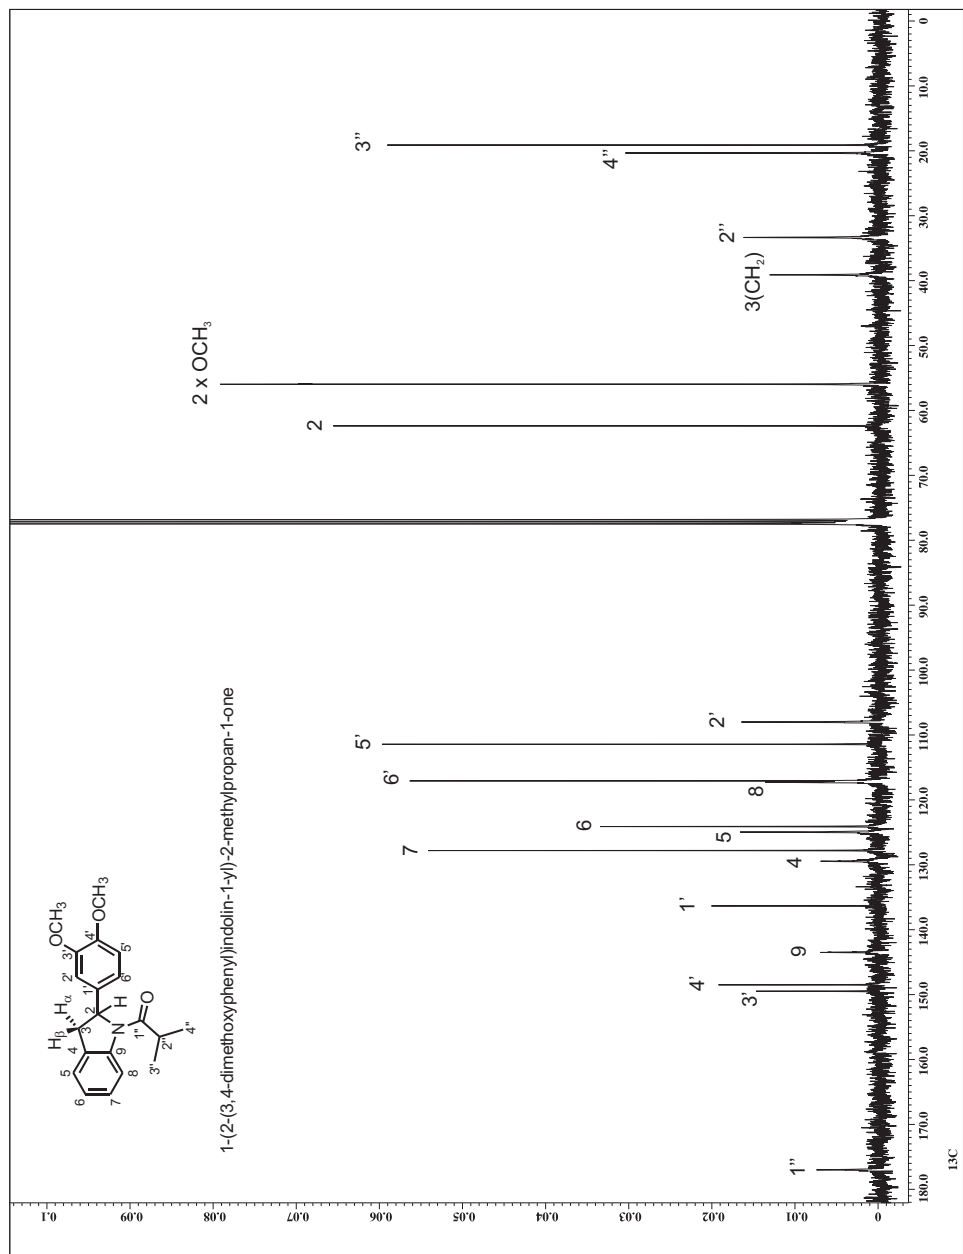

Figure S11: <sup>13</sup>C spectrum (CDCl<sub>3</sub>, 100MHz) of **15**.

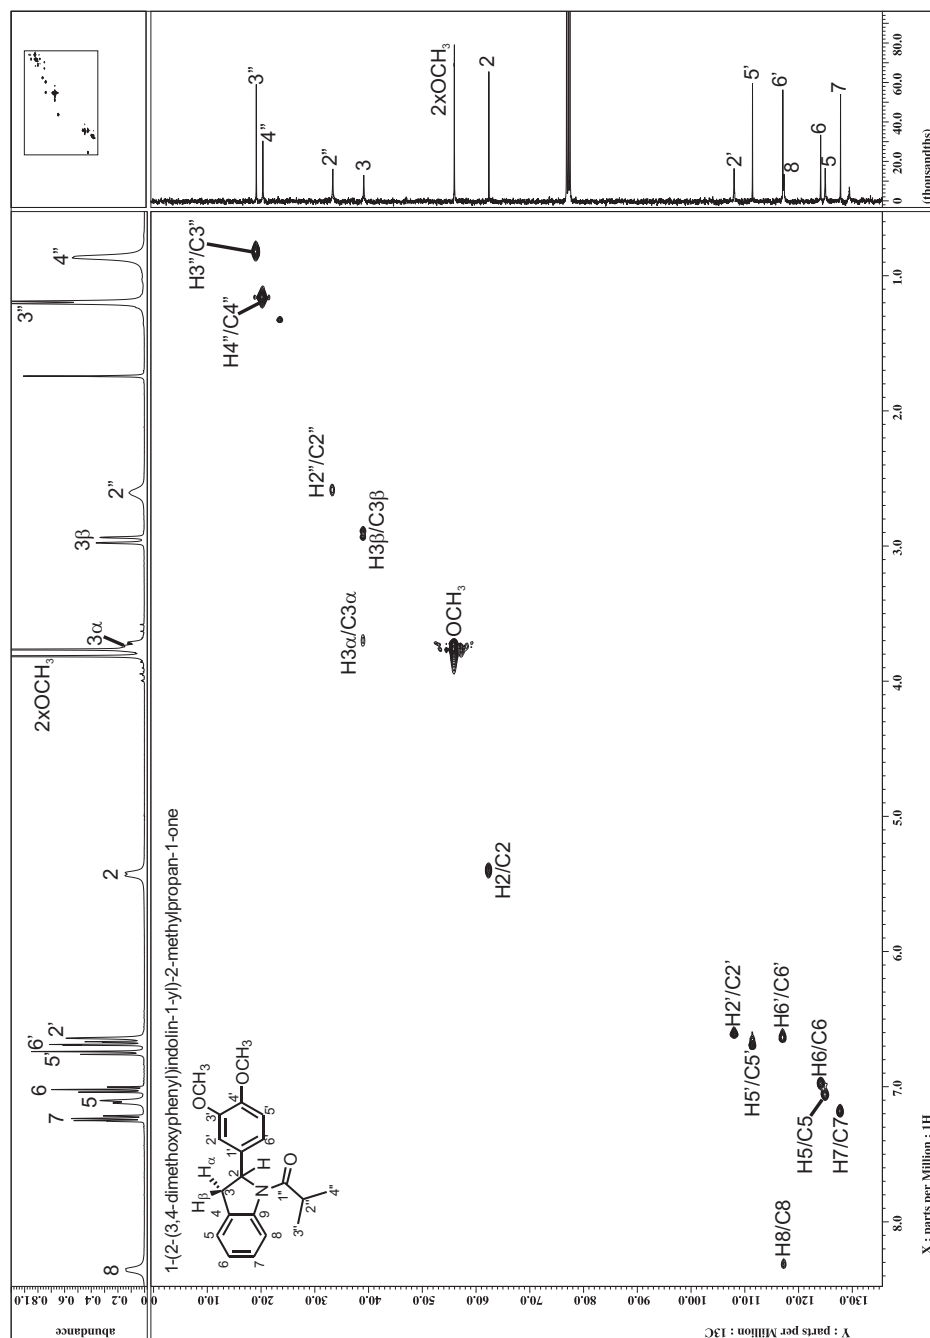

Figure S12: HSQC spectrum (CDCl<sub>3</sub>, 400MHz) of **15**.



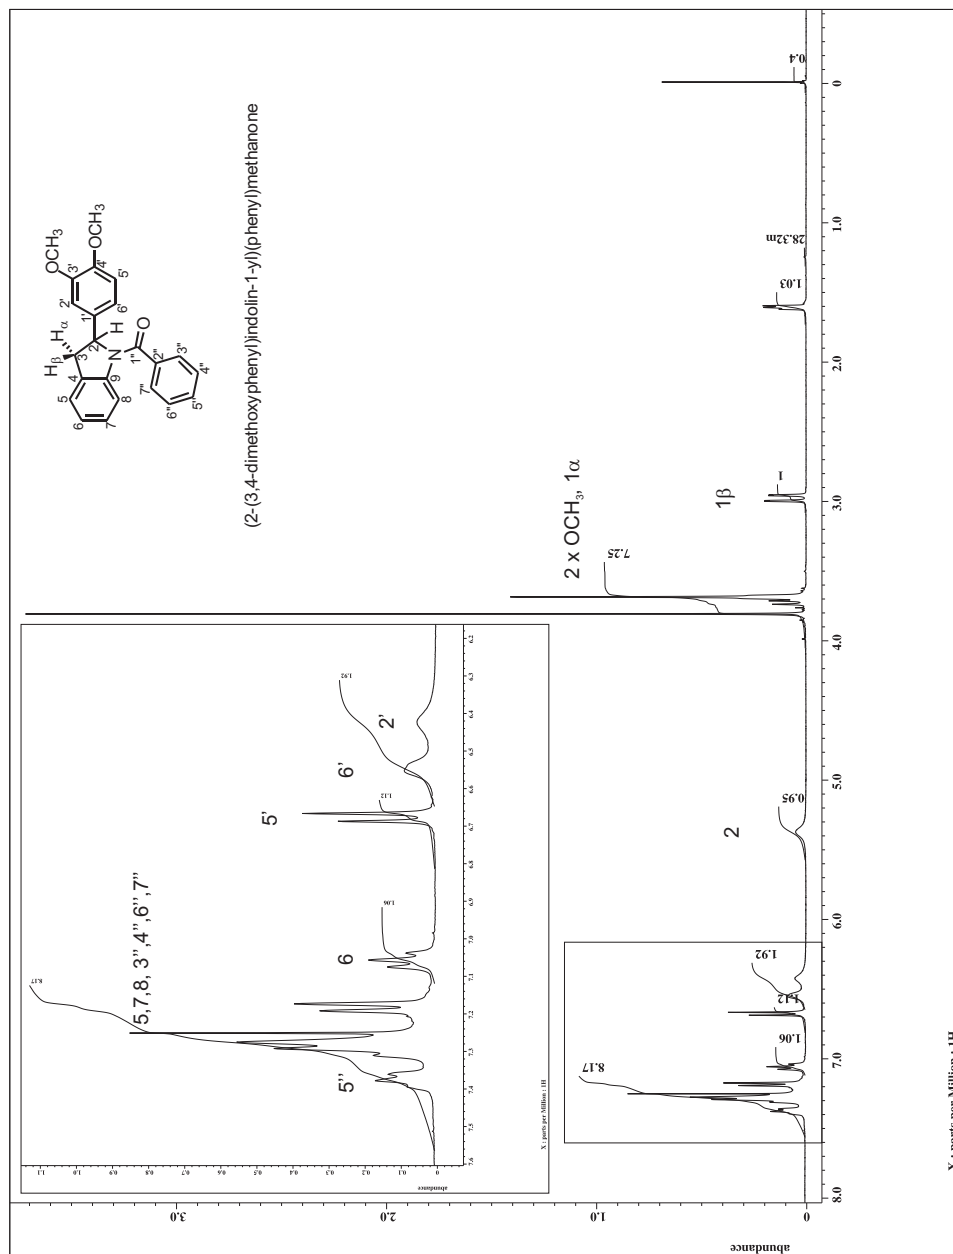

Figure S14: <sup>1</sup>H spectrum (CDCl<sub>3</sub>, 400MHz) of **16**.

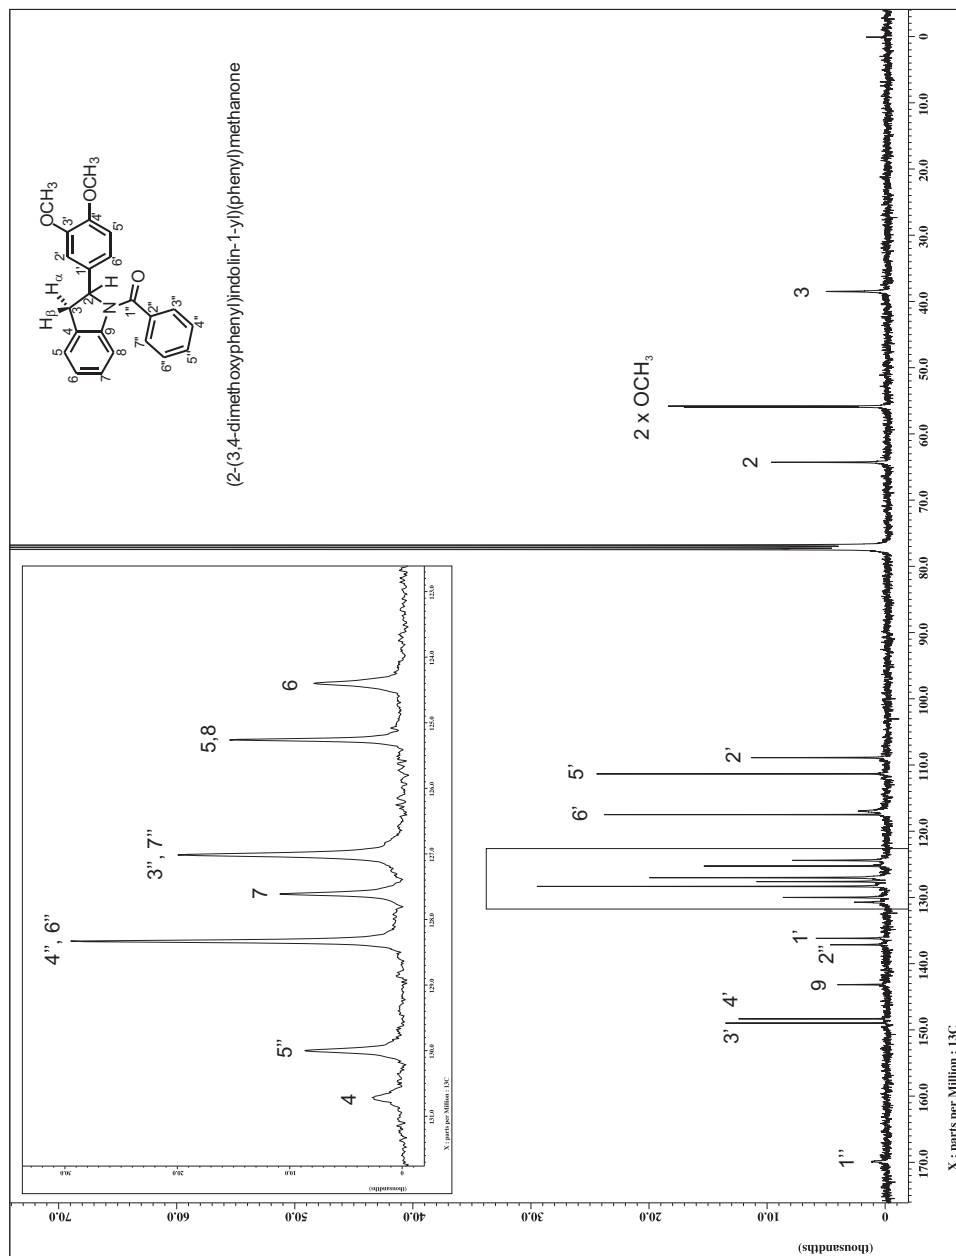

Figure S15: <sup>13</sup>C spectrum (CDCl<sub>3</sub>, 100MHz) of **16**.

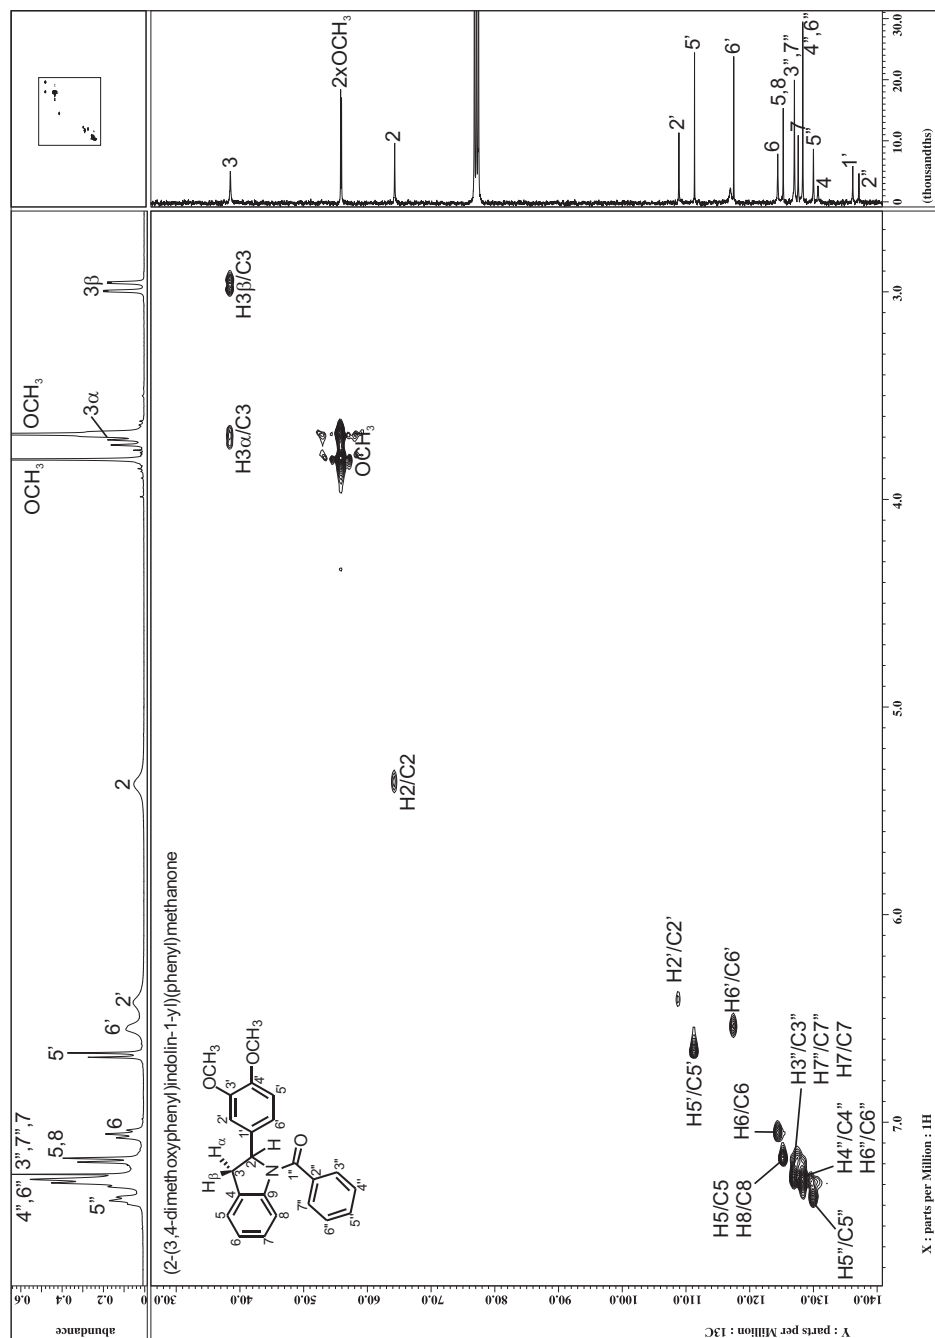

Figure S16: HSQC spectrum (CDCl<sub>3</sub>, 400MHz) of **16**.

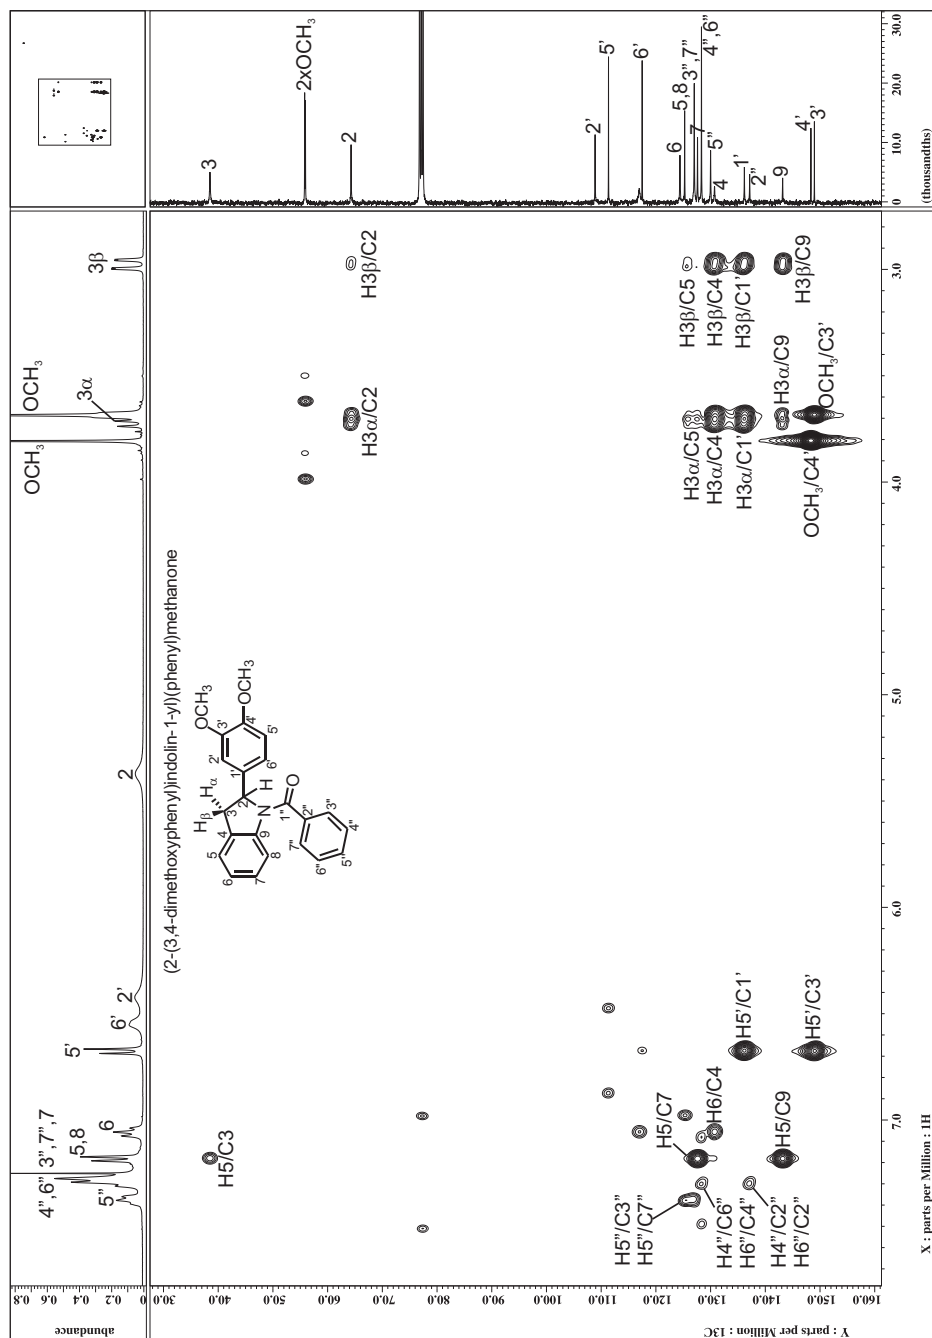

Figure S17: HMBC spectrum ( $\text{CDCl}_3$ , 400MHz) of **16**.

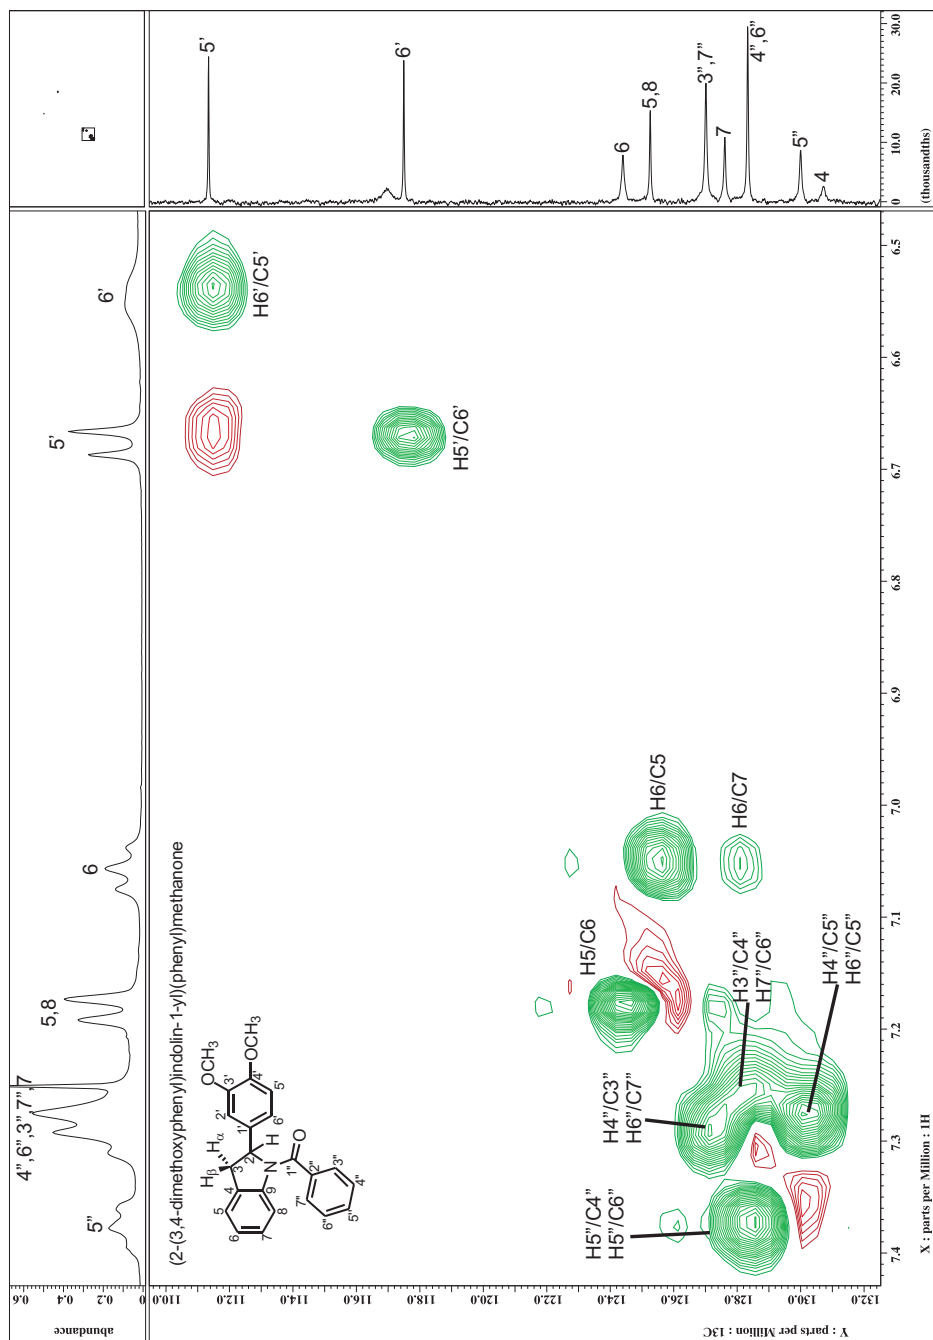

Figure S18: H2BC spectrum (CDCl<sub>3</sub>, 400MHz) of 16.





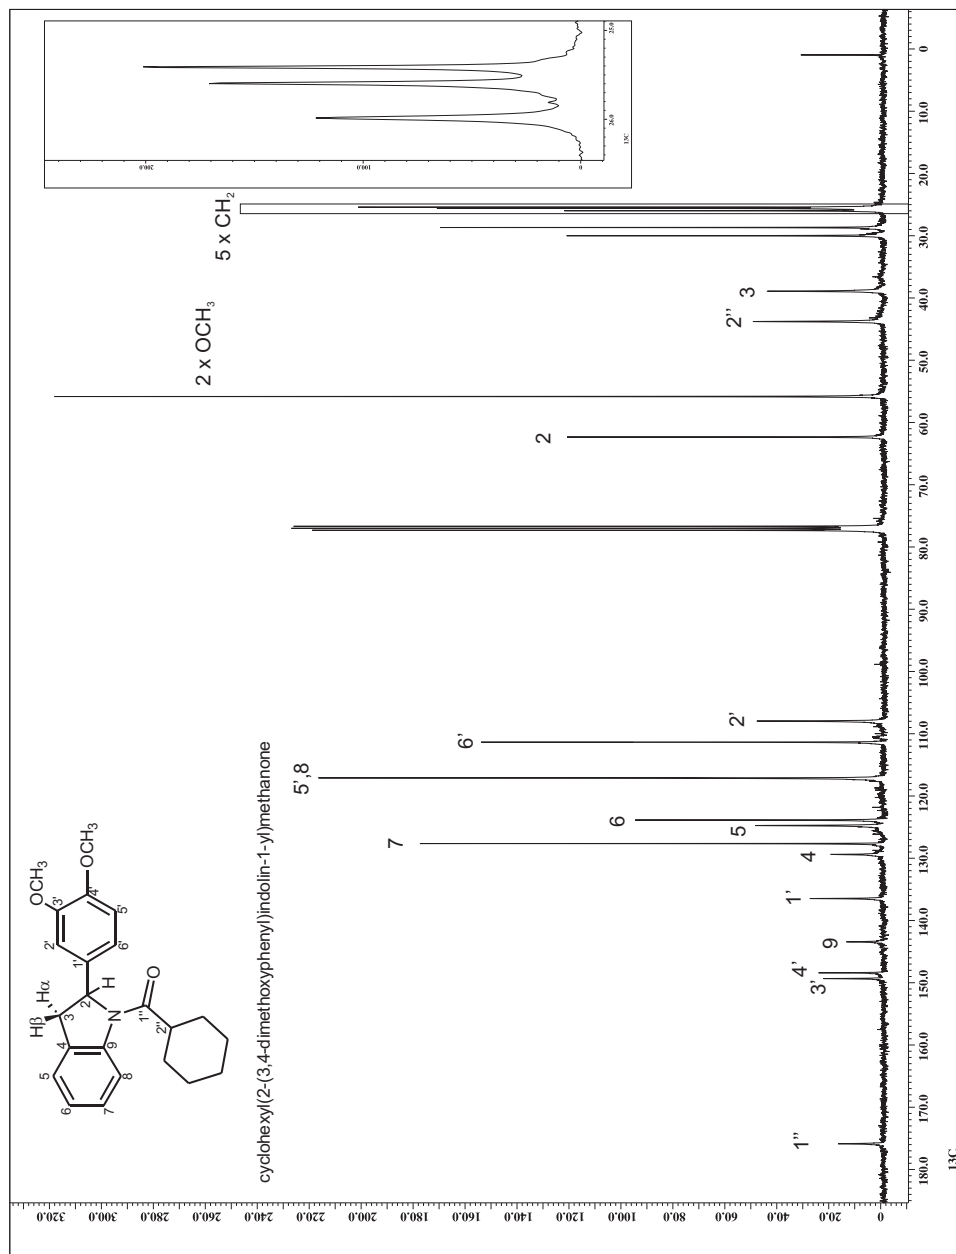

Figure S20: <sup>13</sup>C spectrum (CDCl<sub>3</sub>, 100MHz) of **17**.

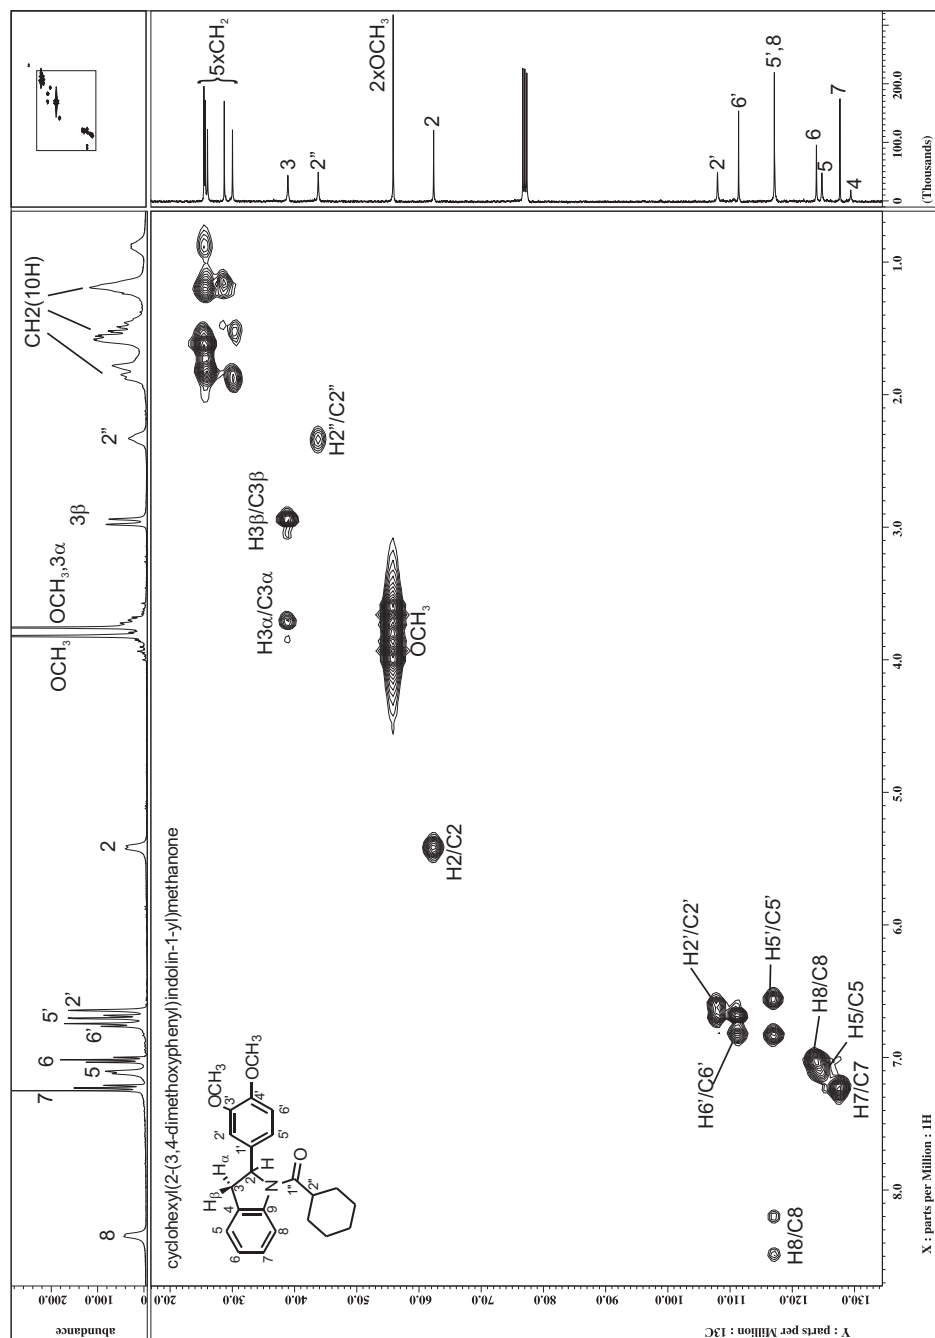

Figure S21: HMQC spectrum (CDCl<sub>3</sub>, 400MHz) of **17**.



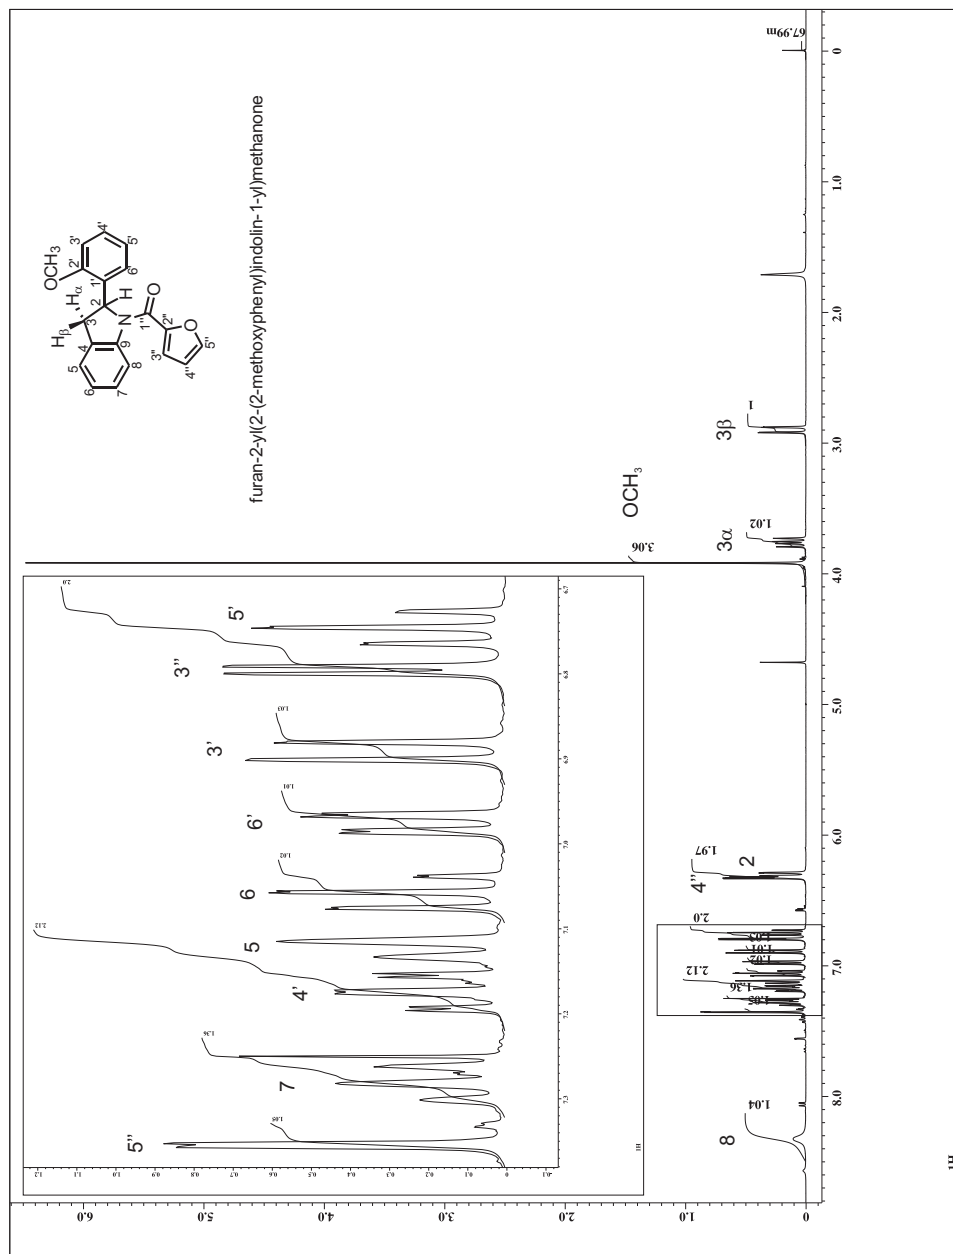

Figure S23: <sup>1</sup>H spectrum (CDCl<sub>3</sub>, 400MHz) of **18**.

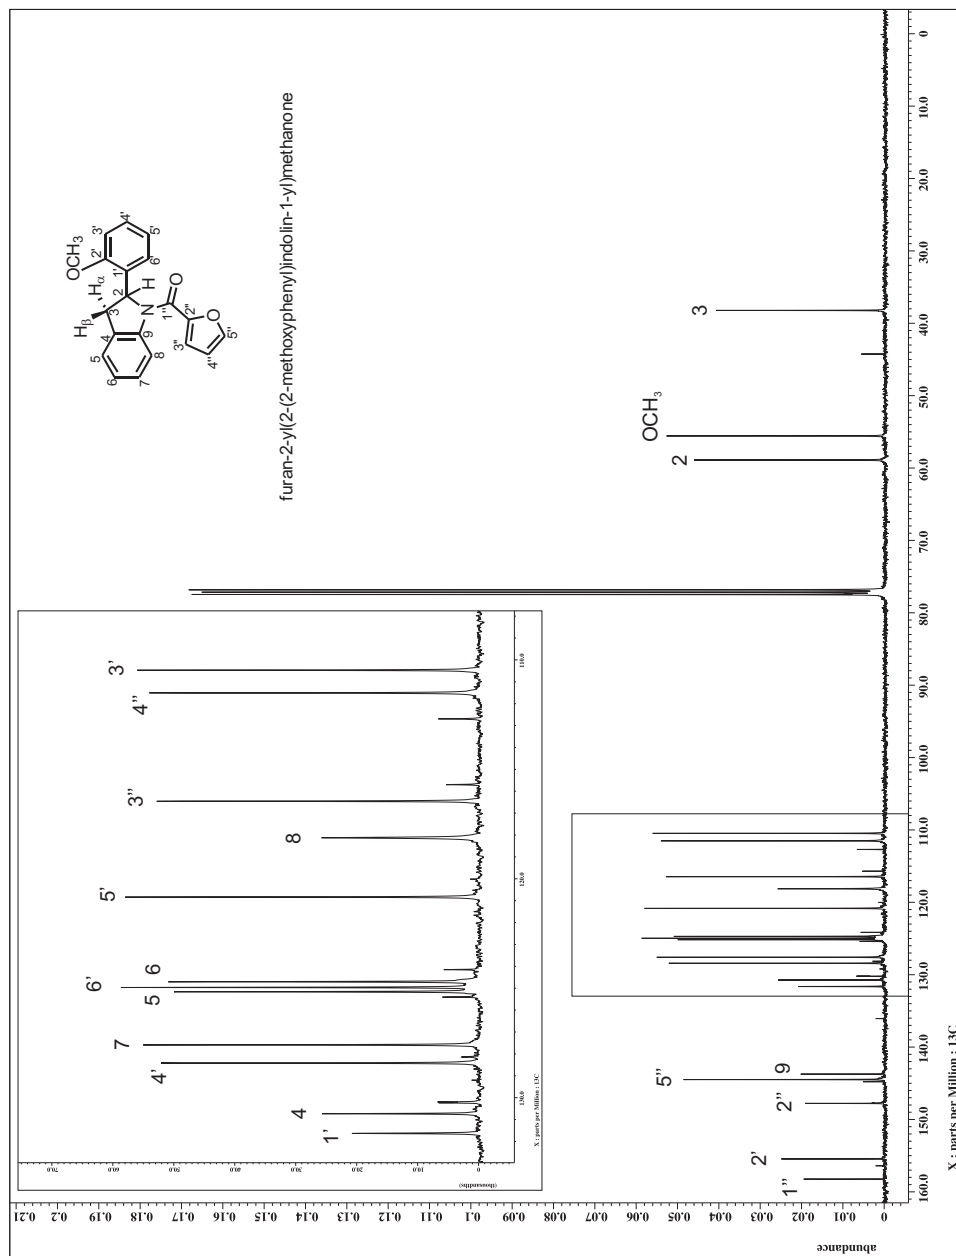

Figure S24: <sup>13</sup>C spectrum (CDCl<sub>3</sub>, 100MHz) of **18**.

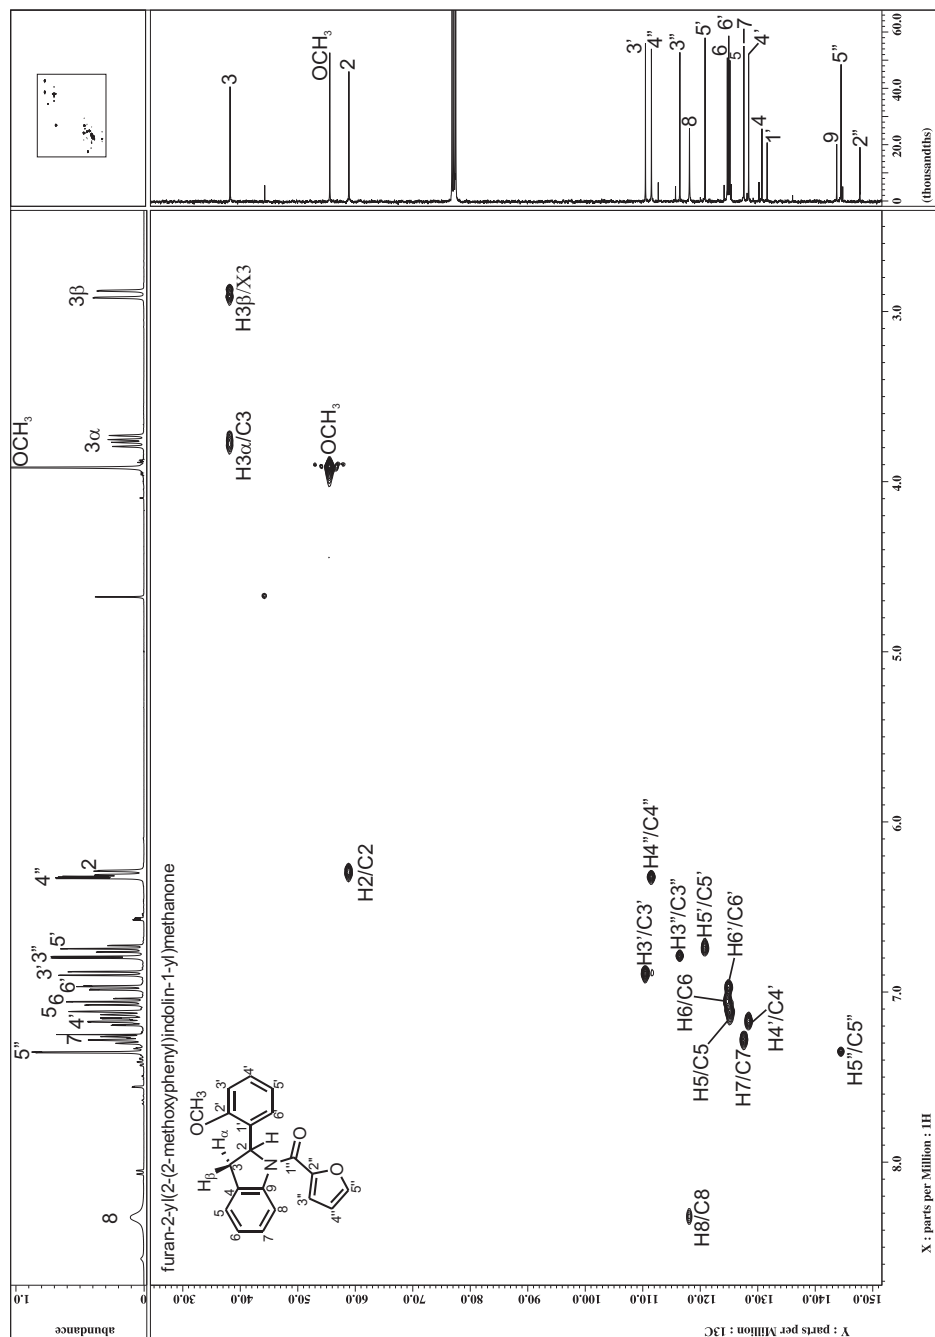

Figure S25: HSQC spectrum (CDCl<sub>3</sub>, 400MHz) of **18**.

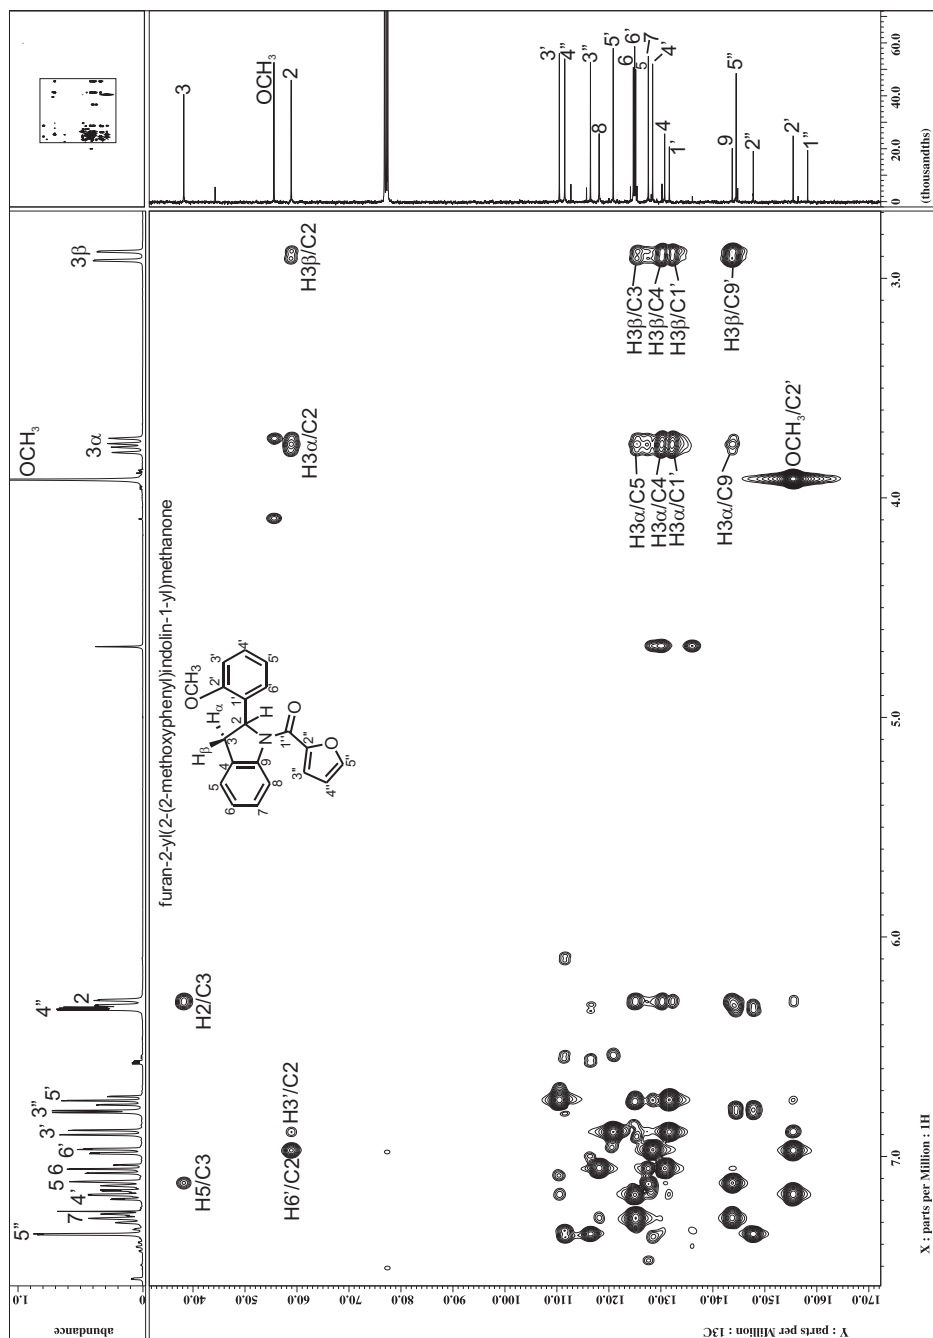

Figure S26: HMBC spectrum (CDCl<sub>3</sub>, 400MHz) of **18**.



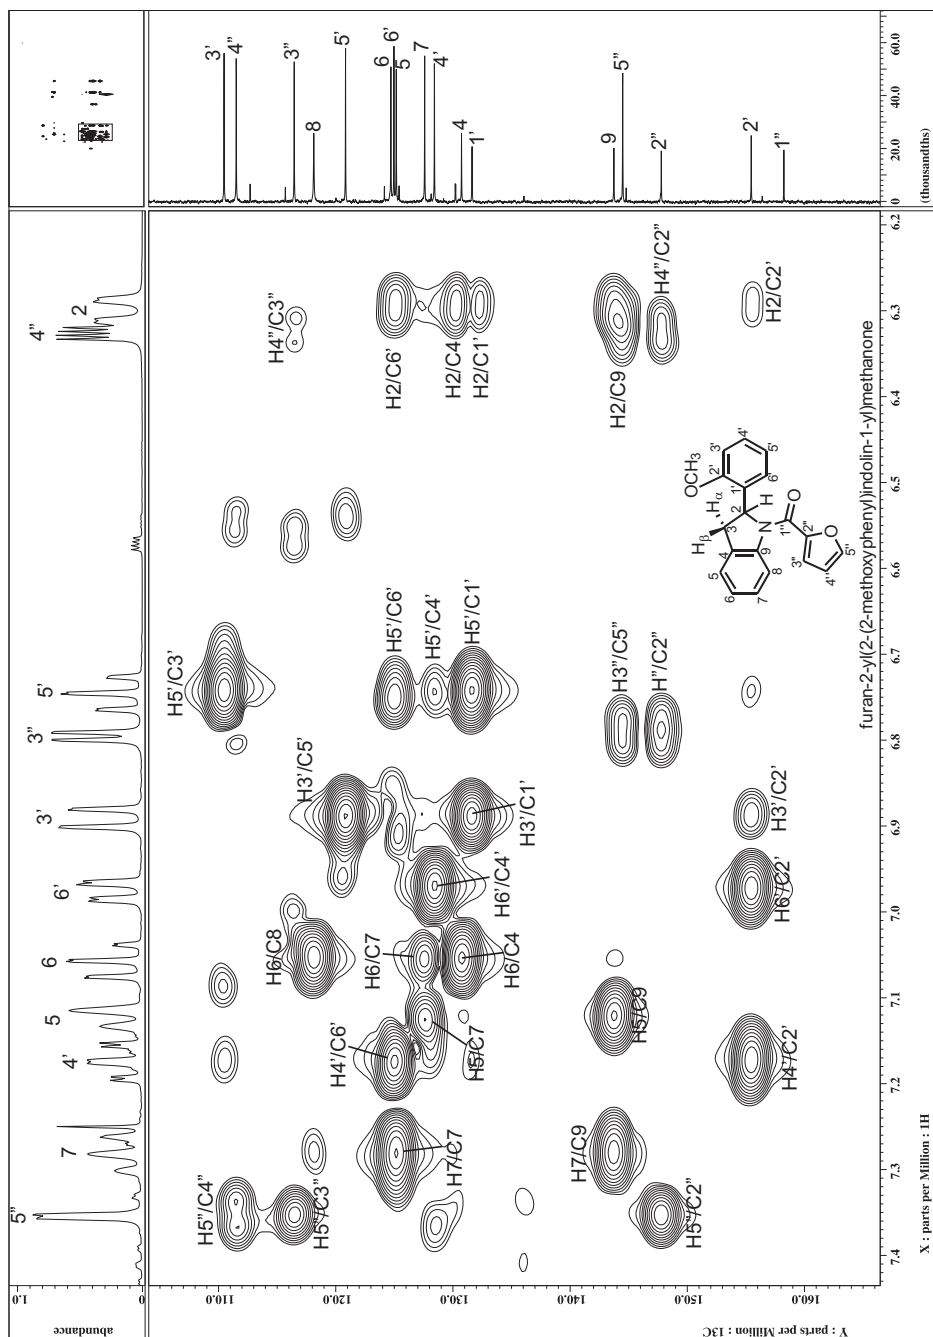

Figure S27: HMBC spectrum (CDCl<sub>3</sub>, 400MHz) of **18** (expanded).

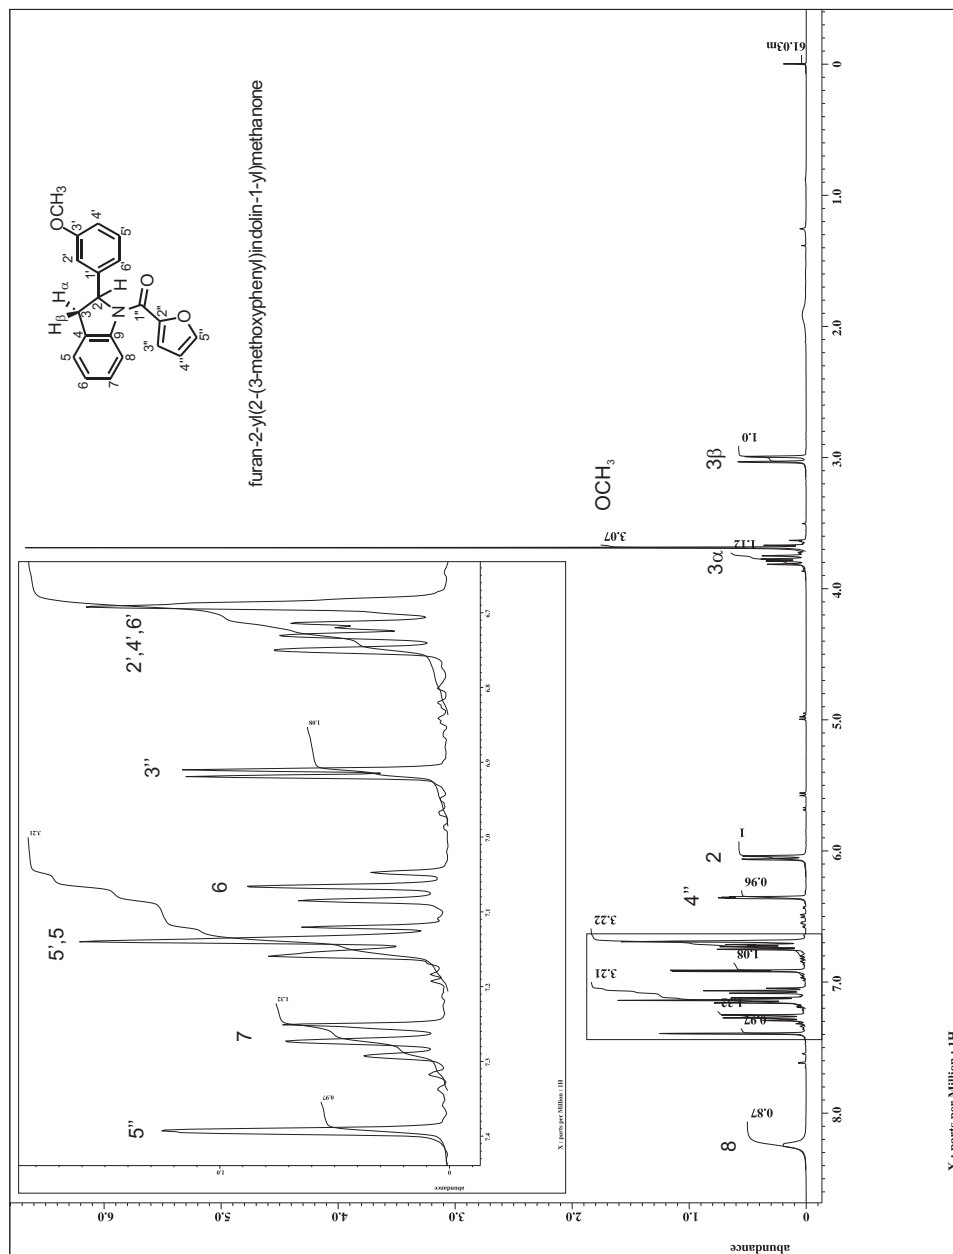

Figure S28:  $^1\text{H}$  spectrum ( $\text{CDCl}_3$ , 400MHz) of **19**.

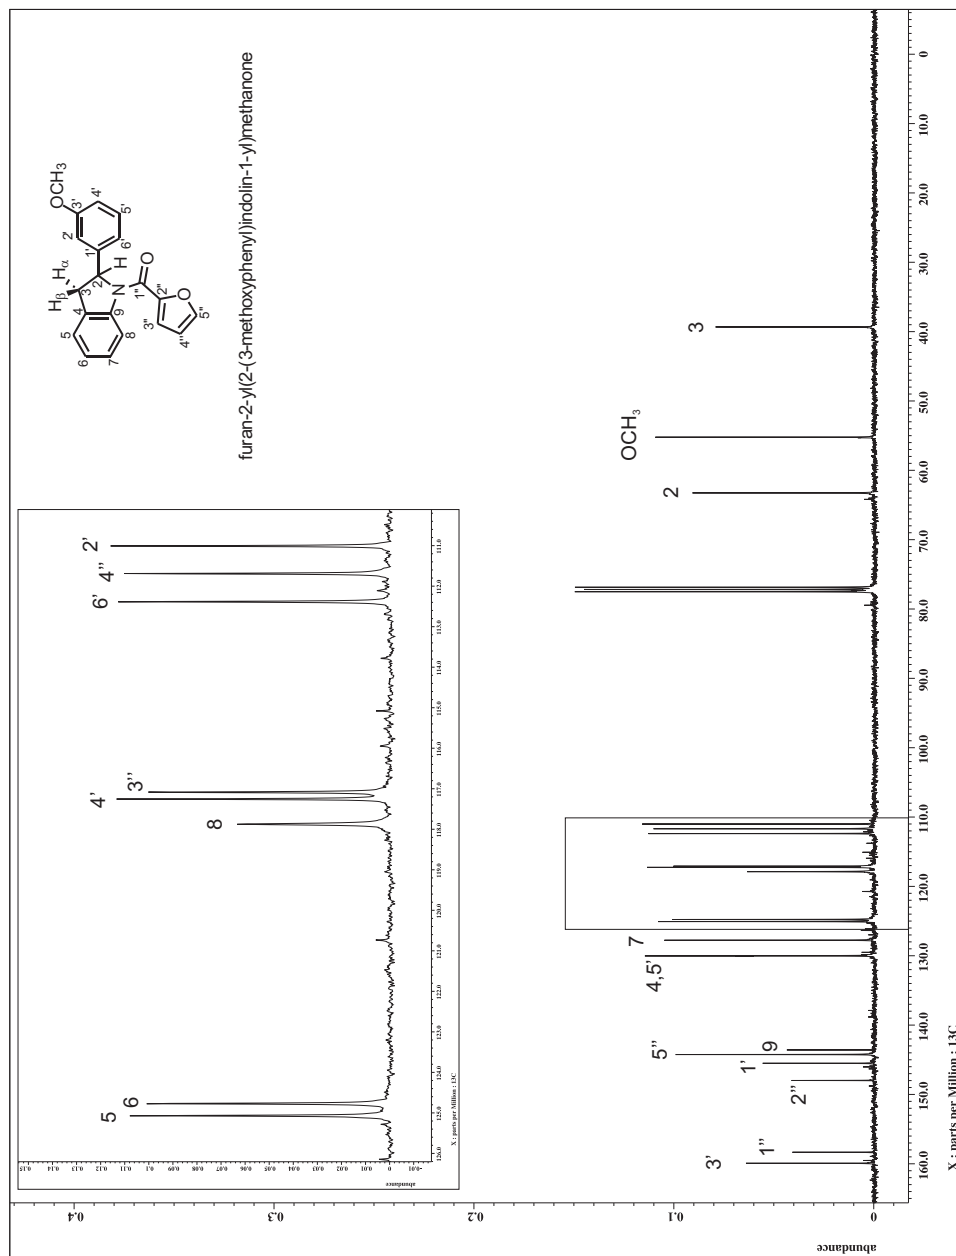

Figure S29: <sup>13</sup>C spectrum (CDCl<sub>3</sub>, 100MHz) of **19**.



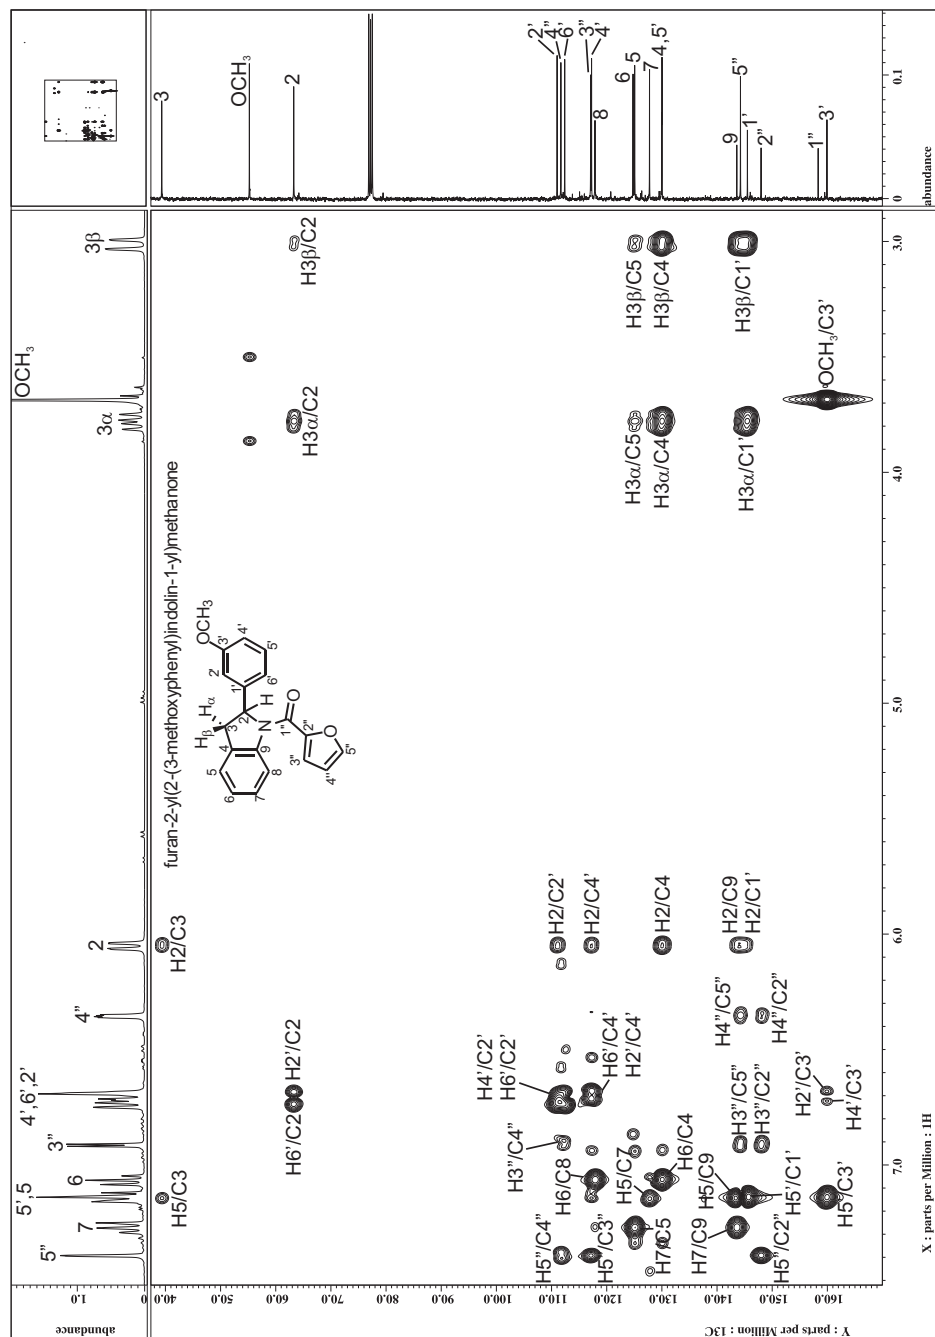

Figure S31: HMBC spectrum (CDCl<sub>3</sub>, 400MHz) of **19**.

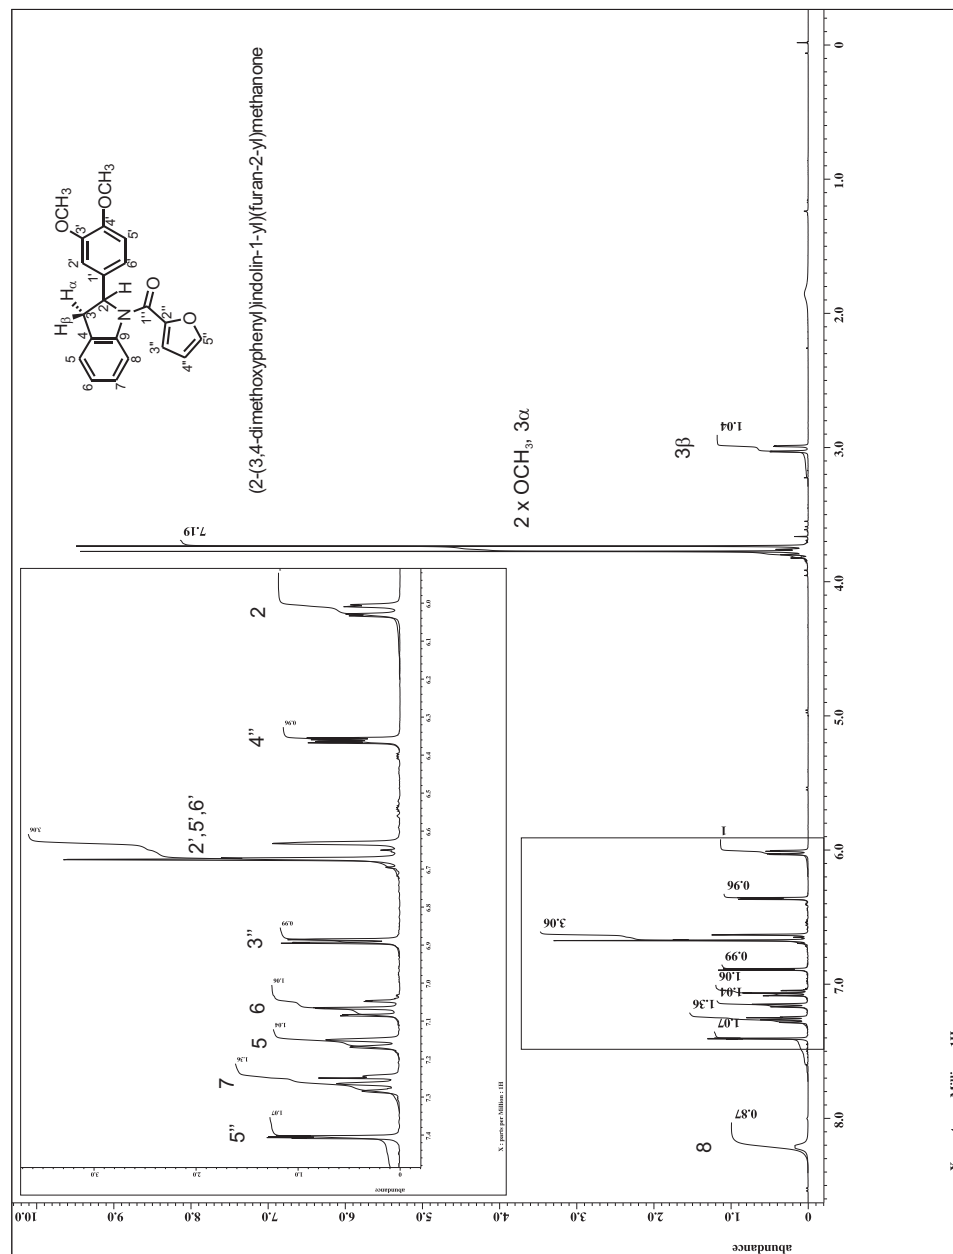

Figure S32: <sup>1</sup>H spectrum (CDCl<sub>3</sub>, 400MHz) of 20a.

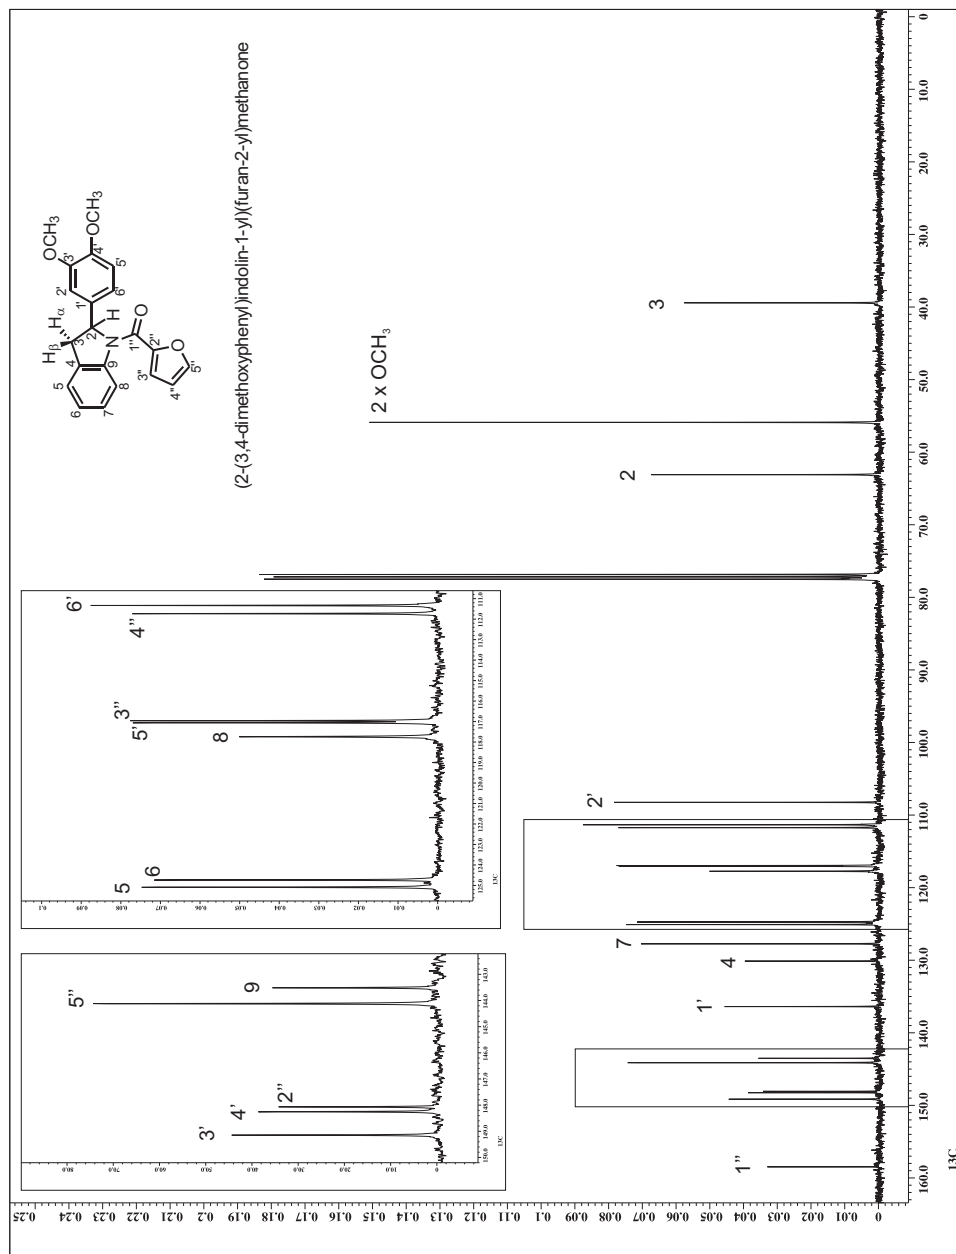

Figure S33: <sup>13</sup>C spectrum (CDCl<sub>3</sub>, 100MHz) of **20a**.







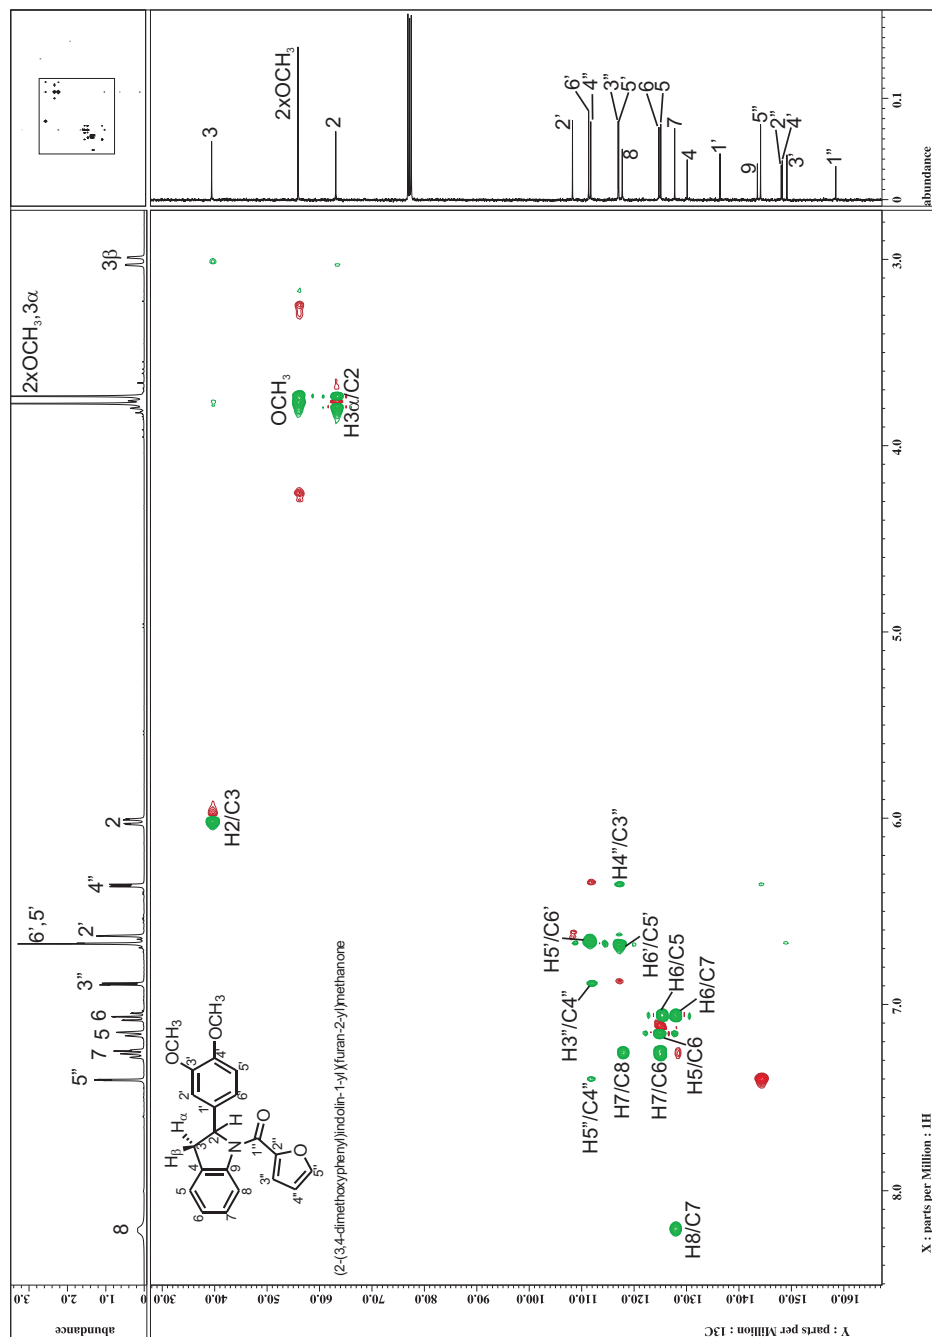

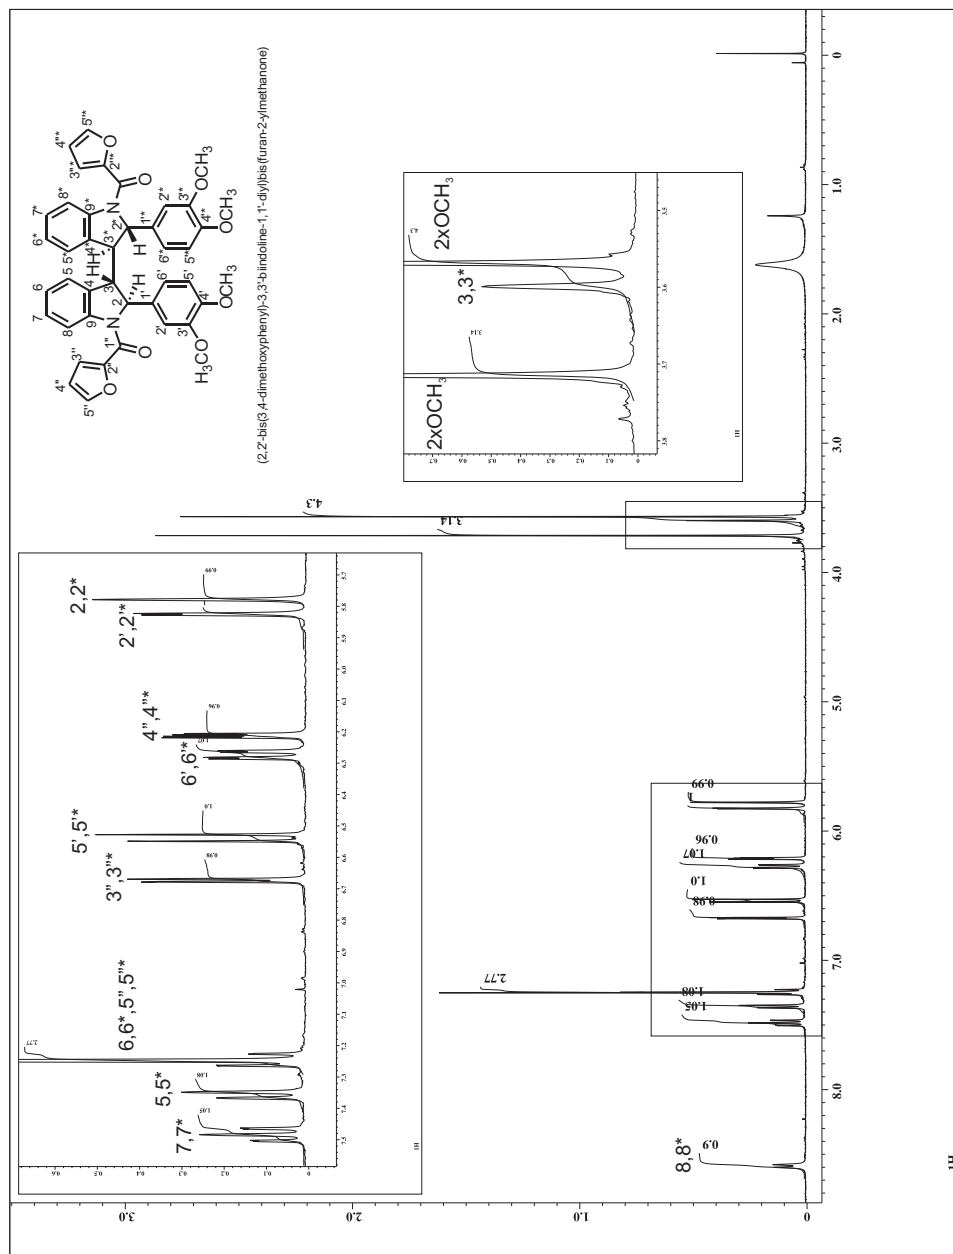

Figure S37: <sup>1</sup>H spectrum (CDCl<sub>3</sub>, 400MHz) of (±)20b.





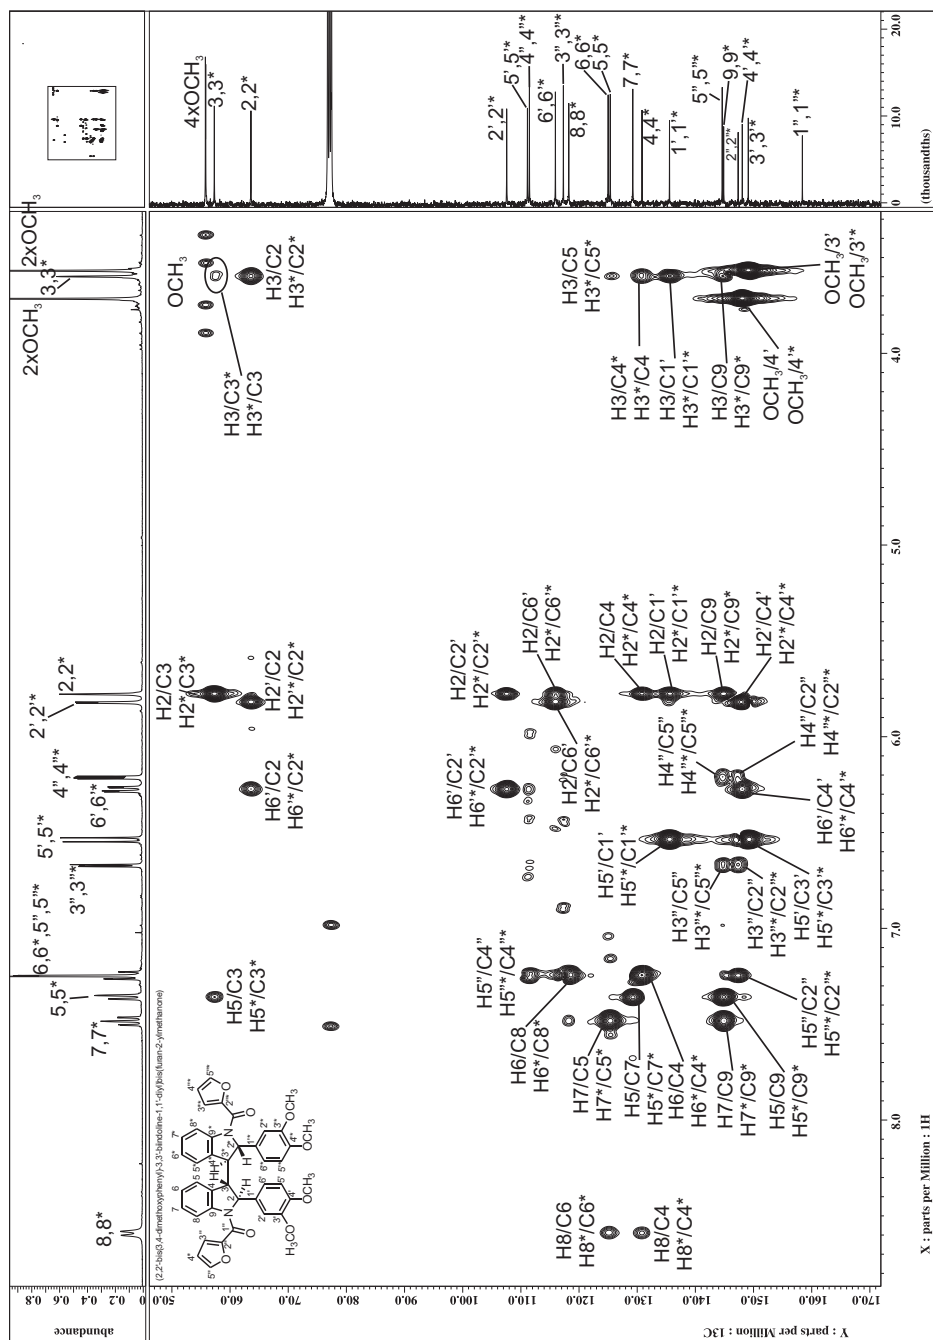

Figure S40: HMBC spectrum ( $\text{CDCl}_3$ , 400MHz) of (±)**20b**.



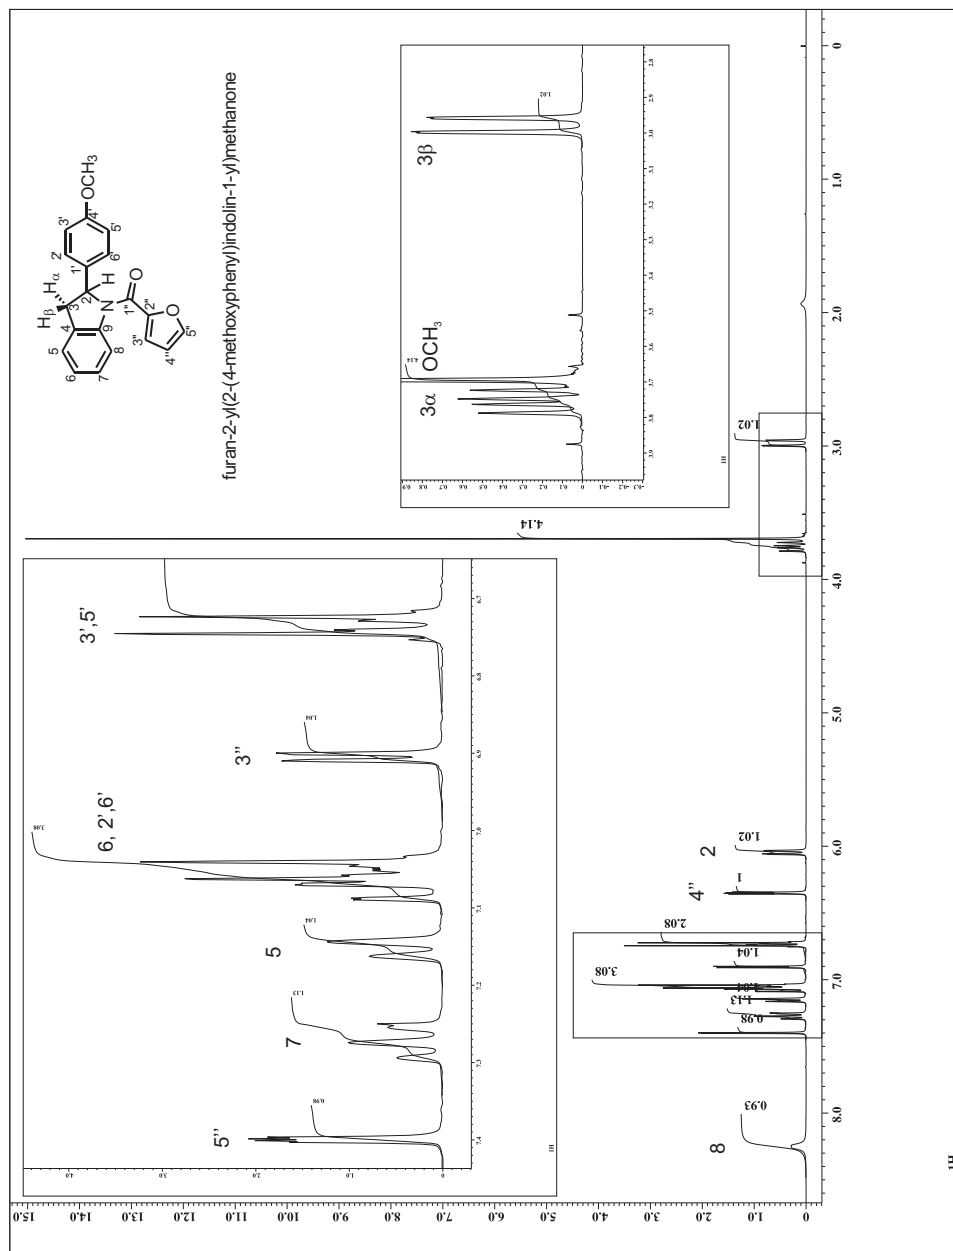

Figure S42:  $^1\text{H}$  spectrum ( $\text{CDCl}_3$ , 400MHz) of **21a**.



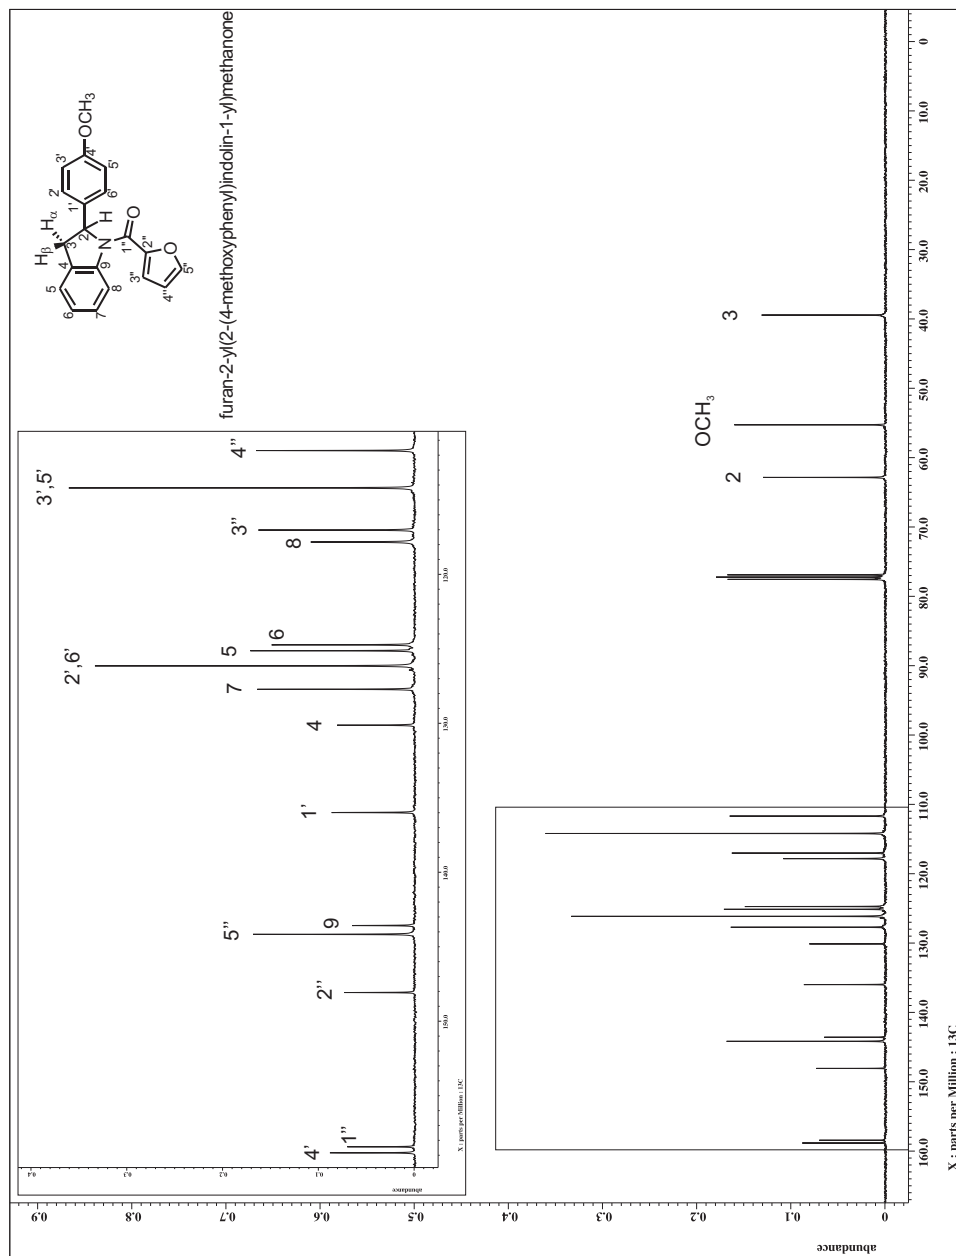

Figure S43: <sup>13</sup>C spectrum (CDCl<sub>3</sub>, 100MHz) of **21a**.

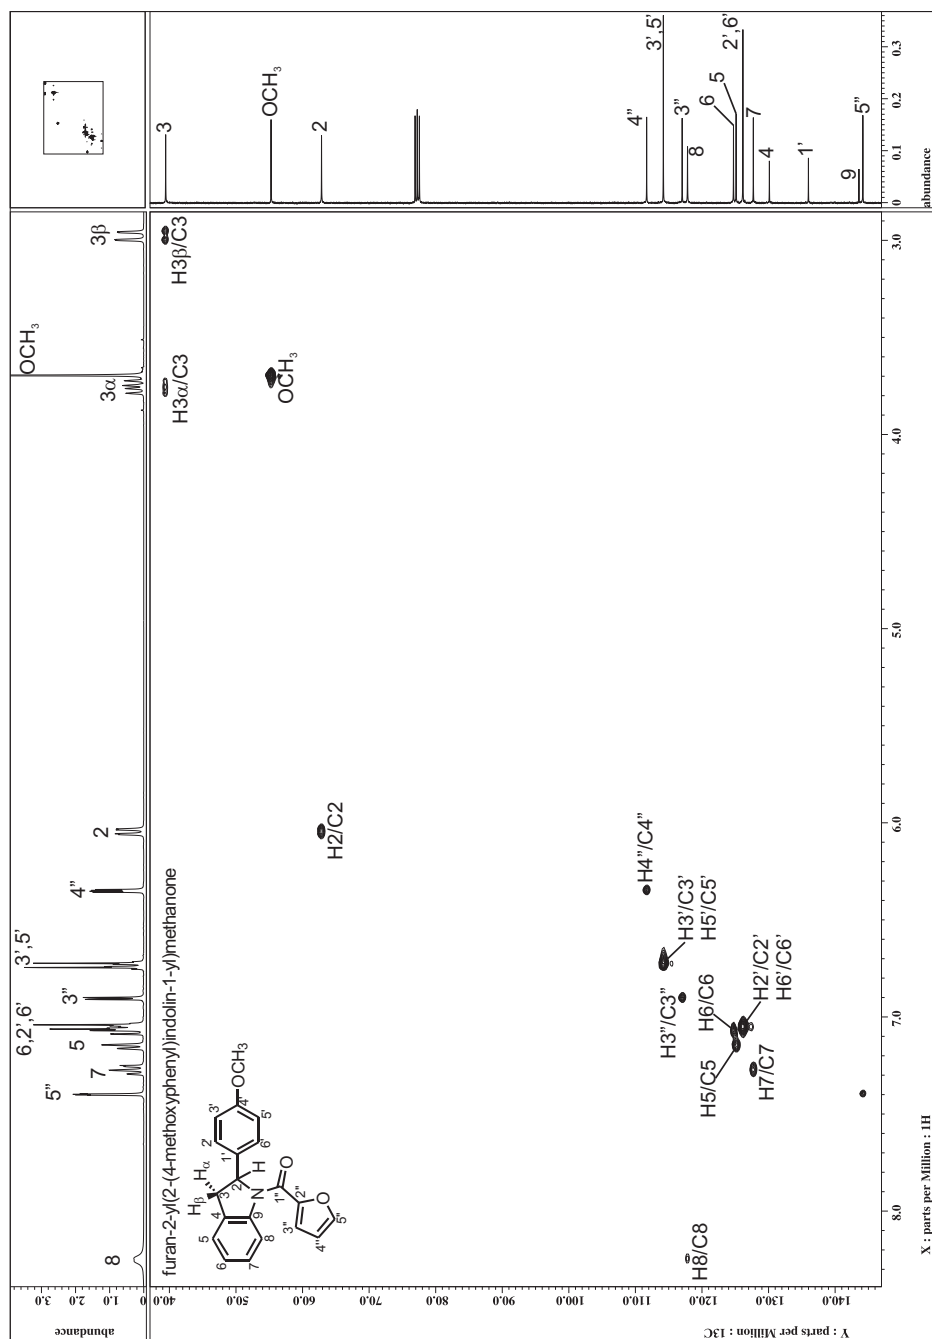

Figure S44: HSQC spectrum (CDCl<sub>3</sub>, 400MHz) of **21a**.



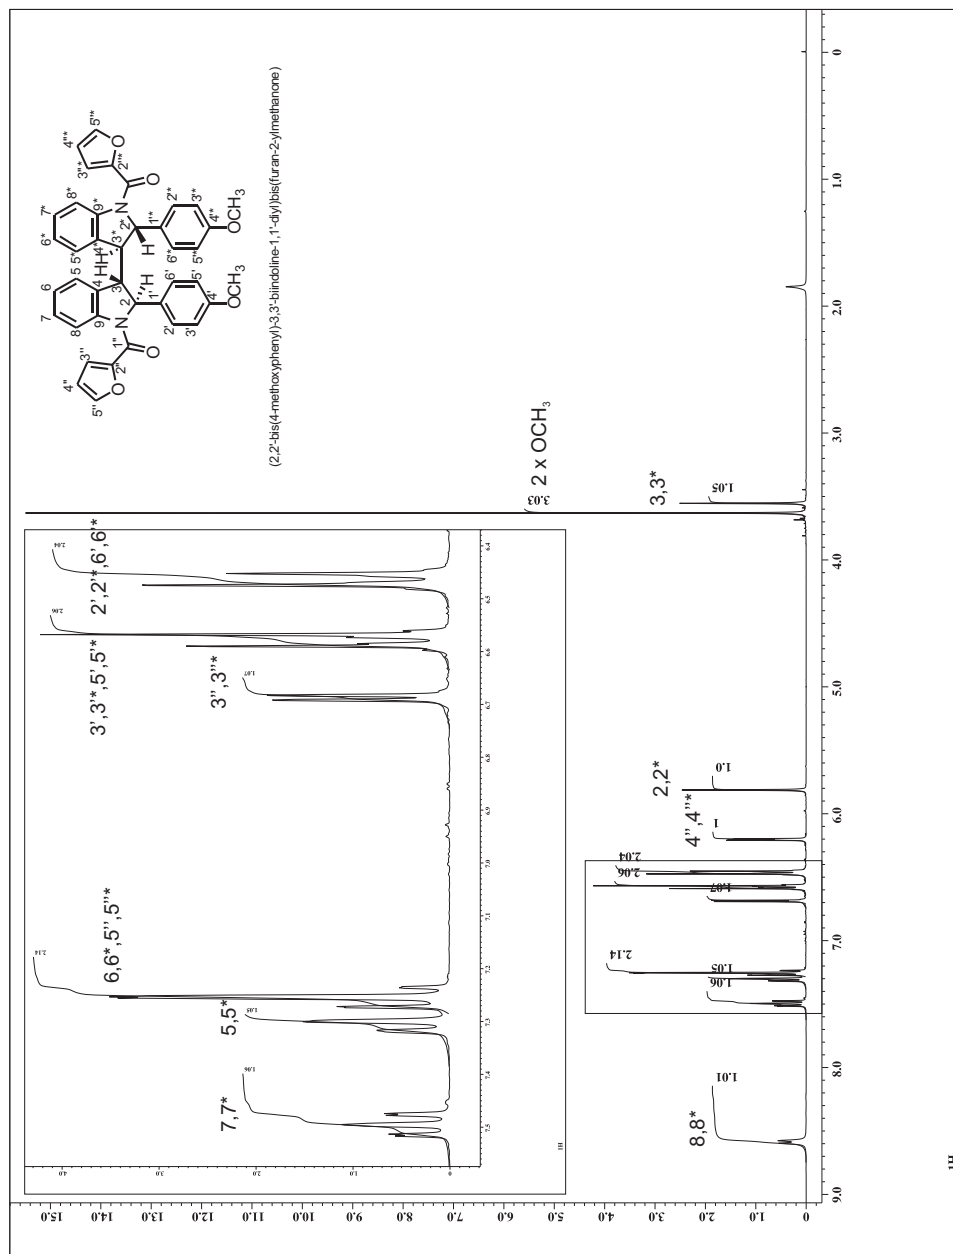

Figure S46: <sup>1</sup>H spectrum (CDCl<sub>3</sub>, 400MHz) of (±)**21b**.

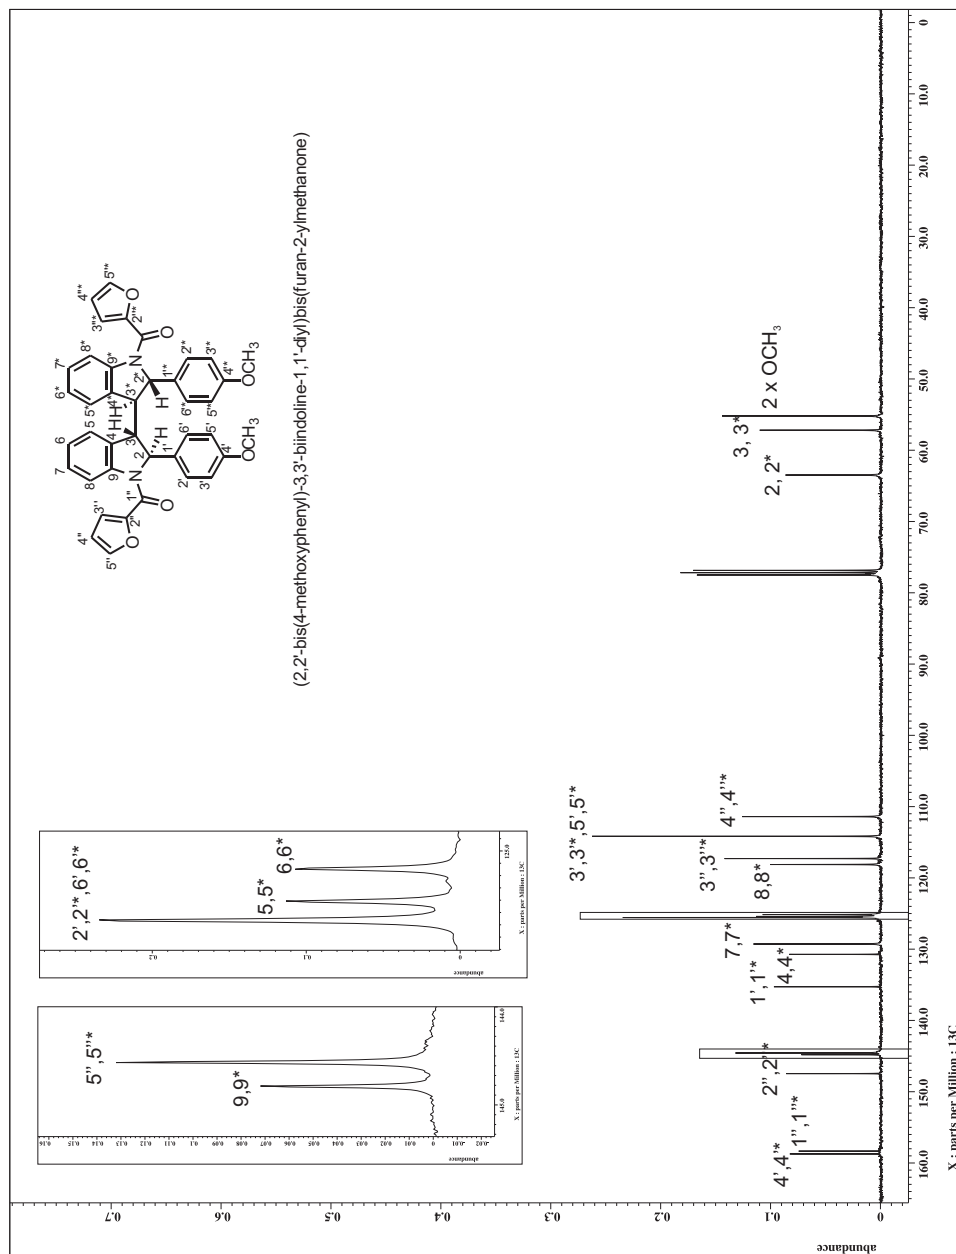

Figure S47: <sup>13</sup>C spectrum (CDCl<sub>3</sub>, 100MHz) of (±)**21b**.

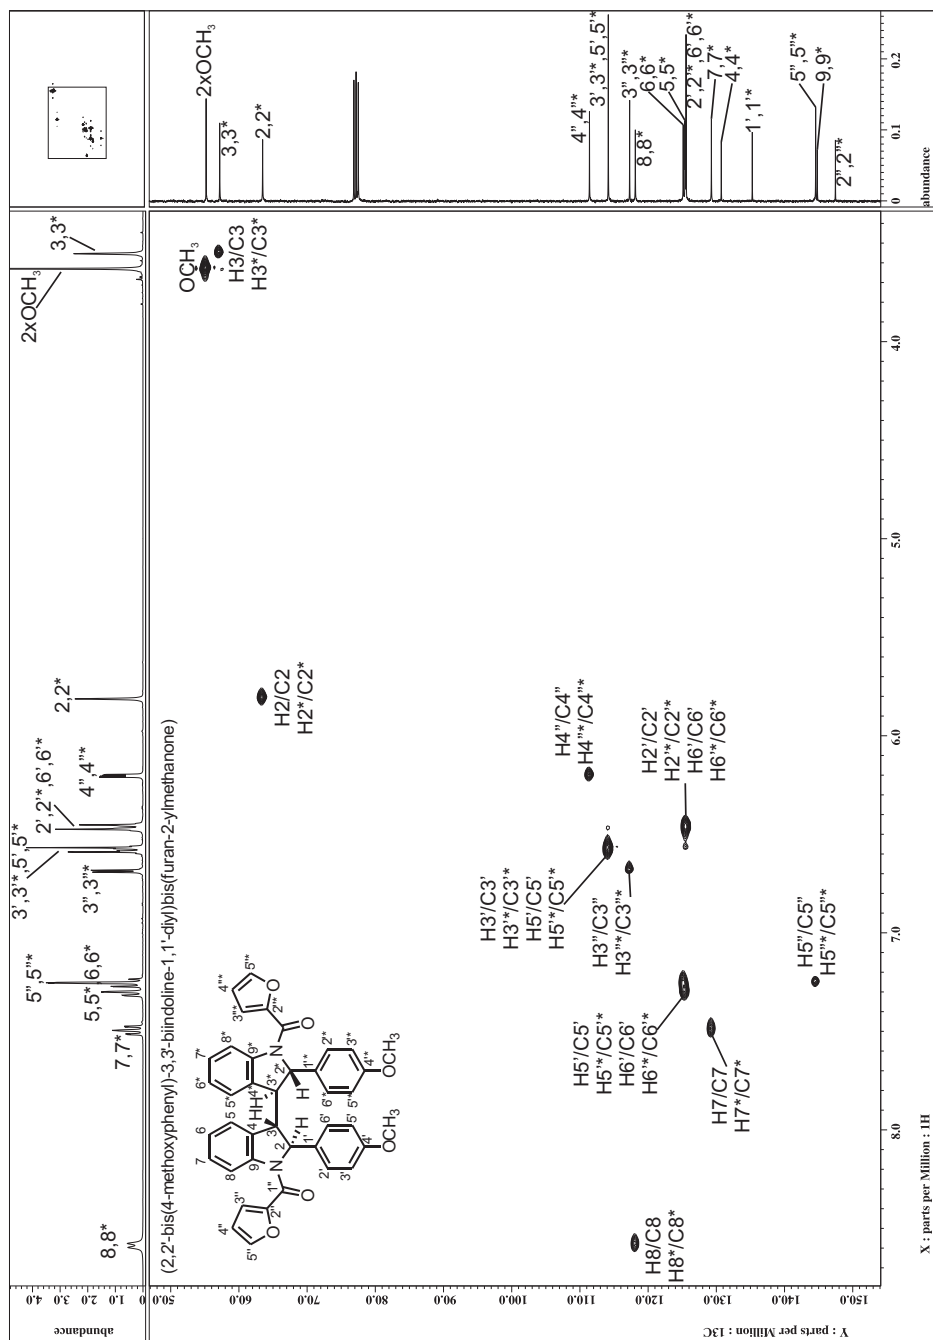

Figure S48: HSQC spectrum ( $\text{CDCl}_3$ , 400MHz) of ( $\pm$ )**21b**.

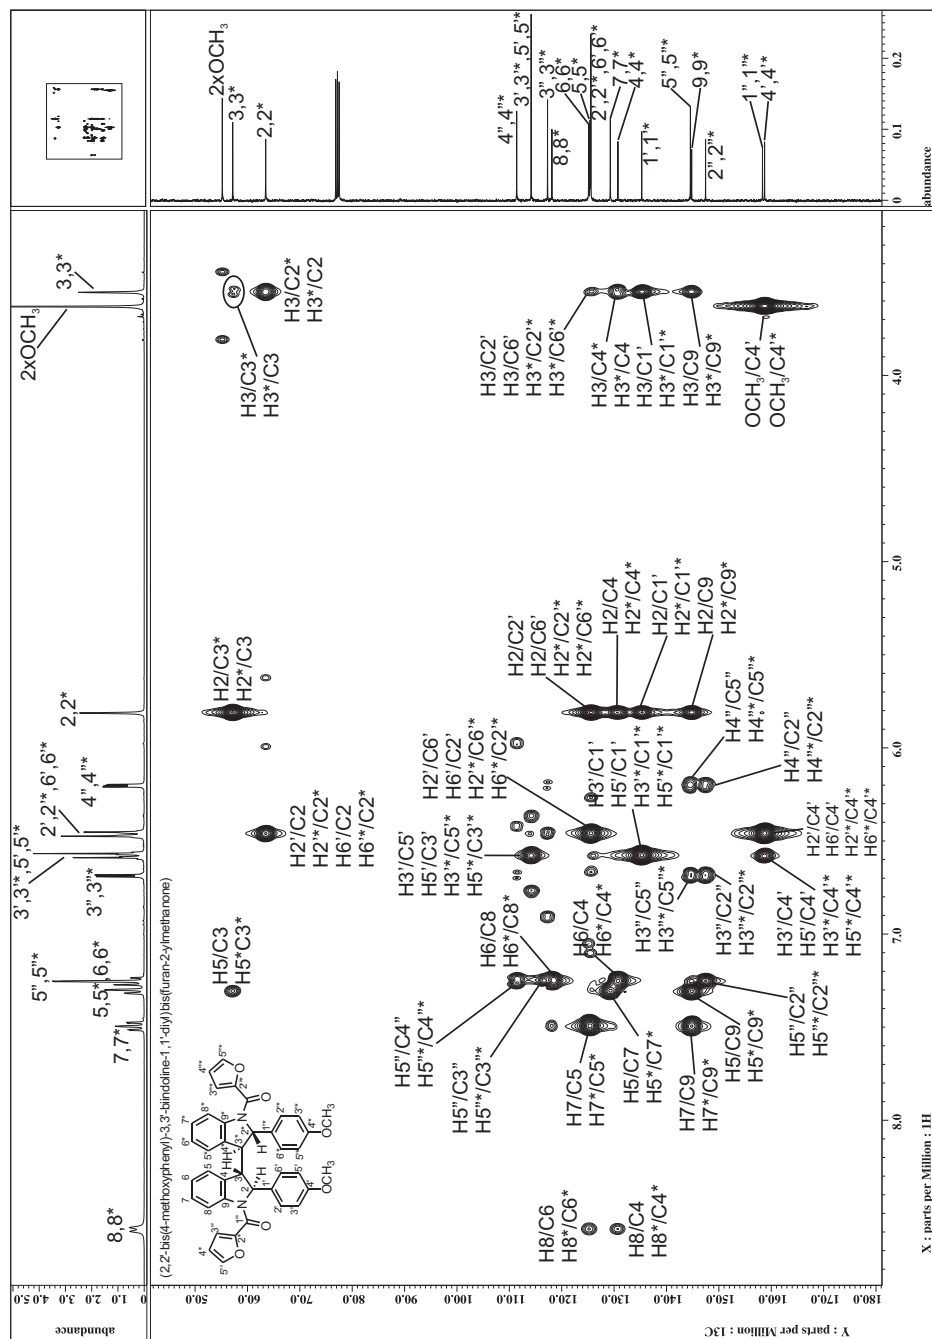

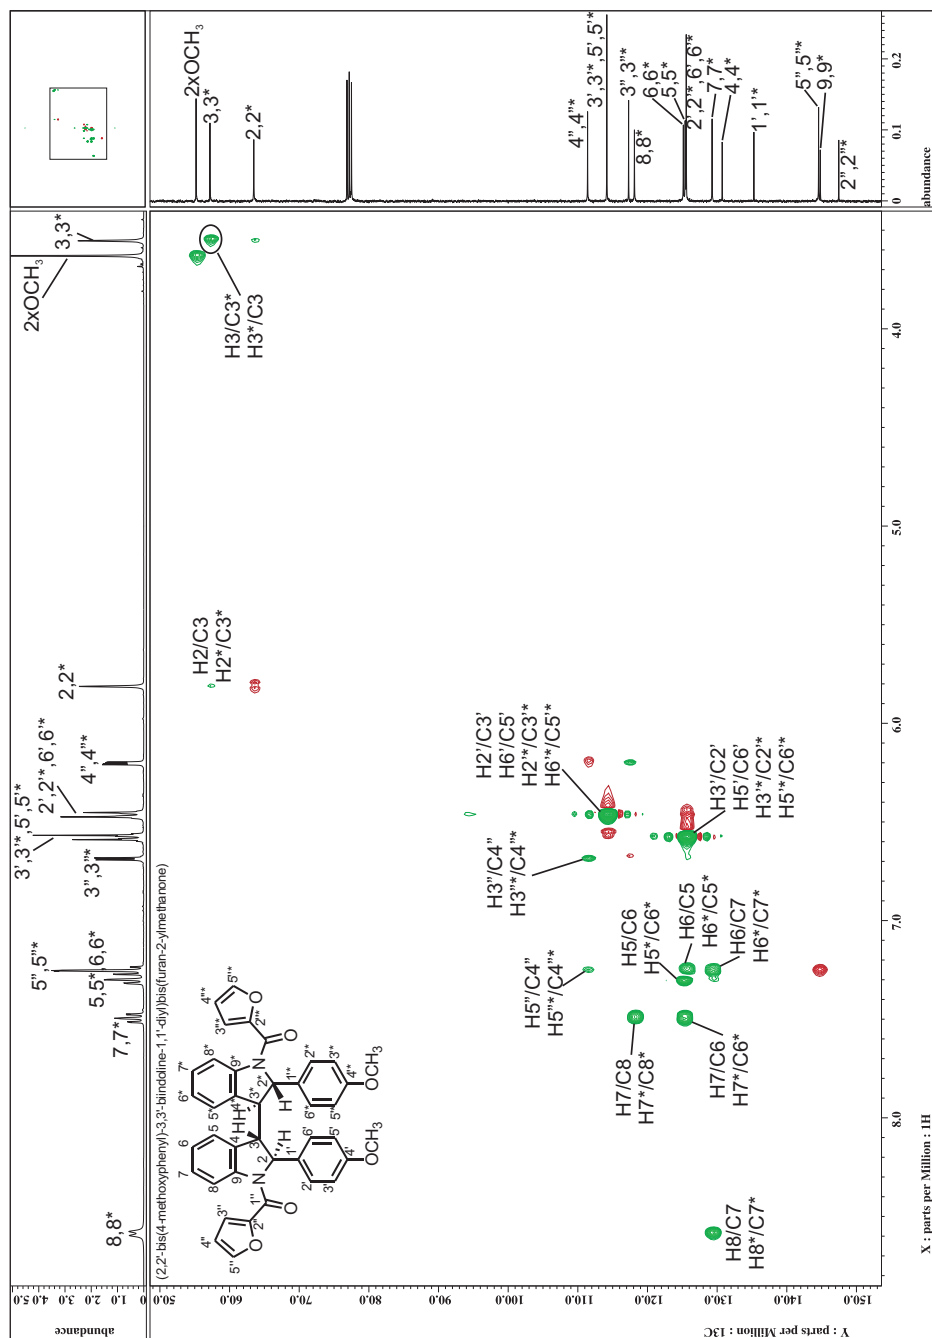

Figure S50: H2BC spectrum (CDCl<sub>3</sub>, 400MHz) of (±)**21b**.
